# Supplementary material
Source: PubMed Central journal article supplement (PMC11197121)
Supplement: sj-pdf-1-jfm-10.1177_1098612X21991456.pdf [file sj-pdf-1-jfm-10.1177_1098612X21991456.pdf]

## Questionnaire 8: My 6 year old cat

Thank you for taking the time to update us about your cat's progress, now that he/she is 6 years old.

As before, this questionnaire contains a mixture of new questions, as well as some questions that you have answered previously – so that we can see what, if anything, has changed for your cat.

**Completing this questionnaire should be straightforward** and take about 20 minutes. If there are any questions which you do not wish to answer, please leave them blank and move to the next question.

Please return your completed questionnaire in the envelope enclosed.

Thank you for your help – information about the “Bristol Cats” and early results from the study will be available from our website.

**[www.bristol.ac.uk/vetscience/cats](http://www.bristol.ac.uk/vetscience/cats)**

FREEPOST RSHR-AGRJ-UABZ  
Bristol Cats, Dr Jane Murray  
University of Bristol  
Langford House  
Langford  
BRISTOL  
BS40 5DU  
Tel/text: 07827 981412  
[Cat-study@bristol.ac.uk](mailto:Cat-study@bristol.ac.uk)

## **SECTION A: Your cat's household**

|    |                                                                                                                              |                     |
|----|------------------------------------------------------------------------------------------------------------------------------|---------------------|
| A1 | Do you still have this cat?                                                                                                  |                     |
|    | <b>Tick one box</b>                                                                                                          |                     |
|    | Yes                                                                                                                          |                     |
|    | No                                                                                                                           |                     |
|    | <b>If "Yes", please go to question A4</b>                                                                                    |                     |
| A2 | Why do you no longer have this cat?                                                                                          |                     |
|    | Reason:                                                                                                                      |                     |
| A3 | Approximately how old was your cat when he/she left your household)?                                                         |                     |
|    | Age of cat: .....                                                                                                            |                     |
|    | <b>We are sorry to learn that you no longer have your cat. Please proceed to Section H to fill in your personal details.</b> |                     |
|    | <b>If you would like to remain on our mailing list for newsletters please tick this box. <input type="checkbox"/></b>        |                     |
|    | <b>Thank you for participating in this study.</b>                                                                            |                     |
| A4 | How happy do you think your cat is?                                                                                          |                     |
|    | <b>Tick one box</b>                                                                                                          |                     |
|    | Very happy                                                                                                                   |                     |
|    | Quite happy                                                                                                                  |                     |
|    | Not very happy                                                                                                               |                     |
|    | Not at all happy                                                                                                             |                     |
|    | I don't know                                                                                                                 |                     |
| A5 | What factors contributed towards your answer above?                                                                          |                     |
| A6 | How many cats in total (including your 'Bristol cat(s)') currently live in this household?                                   |                     |
|    | .....                                                                                                                        |                     |
| A7 | How frequently is this cat in a room where people smoke?                                                                     | <b>Tick one box</b> |
|    | Never (currently and previously)                                                                                             |                     |
|    | Never (currently), but was previously (e.g. household member has stopped smoking)                                            |                     |
|    | Less than once a week                                                                                                        |                     |
|    | Once a week or more often                                                                                                    |                     |

|                                                                                                                                                               |                                                                                                                                  |                         |                     |                 |                           |
|---------------------------------------------------------------------------------------------------------------------------------------------------------------|----------------------------------------------------------------------------------------------------------------------------------|-------------------------|---------------------|-----------------|---------------------------|
| A8                                                                                                                                                            | Please indicate whether or not your cat has spent time during the last week in these types of places <i>inside</i> your home:    |                         |                     |                 |                           |
|                                                                                                                                                               | <b>Tick one box per row</b>                                                                                                      |                         |                     |                 |                           |
|                                                                                                                                                               |                                                                                                                                  | Not available to my cat | Available to my cat |                 |                           |
|                                                                                                                                                               |                                                                                                                                  |                         | Used by cat         | Not used by cat | Don't know if used by cat |
|                                                                                                                                                               | A 'hiding' place that you have created for your cat (e.g. a 'pyramid' bed or cardboard box)                                      |                         |                     |                 |                           |
| On a platform / ledge / raised area that your cat has previously used (but you didn't specifically create for your cat, e.g. on top of boiler, on windowsill) |                                                                                                                                  |                         |                     |                 |                           |
| On a platform / ledge / raised area that you have provided for your cat (e.g. a cat climbing frame bought from a shop)                                        |                                                                                                                                  |                         |                     |                 |                           |
| A9                                                                                                                                                            | Please indicate whether or not your cat has spent time during the last week in the following activities <i>inside</i> your home: |                         |                     |                 |                           |
|                                                                                                                                                               | <b>Tick one box per row</b>                                                                                                      |                         |                     |                 |                           |
|                                                                                                                                                               |                                                                                                                                  | Not available to my cat | Available to my cat |                 |                           |
|                                                                                                                                                               |                                                                                                                                  |                         | Used by cat         | Not used by cat | Don't know if used by cat |
|                                                                                                                                                               | Using a scratching post that you have provided for your cat                                                                      |                         |                     |                 |                           |
| Using something else (other than a purpose built cat scratching post) to scratch on                                                                           |                                                                                                                                  |                         |                     |                 |                           |
| Playing with bought or home-made cat toys                                                                                                                     |                                                                                                                                  |                         |                     |                 |                           |
| Playing with objects (not designed as a toy!) that the cat finds (e.g. a leaf)                                                                                |                                                                                                                                  |                         |                     |                 |                           |

## SECTION B: About your cat's activity levels and indoor/outdoor lifestyle

|                                  |                                                                                                                                                                                                                                                                                                                                                                                                                        |                                        |                                    |                                        |       |            |                                  |  |  |  |  |
|----------------------------------|------------------------------------------------------------------------------------------------------------------------------------------------------------------------------------------------------------------------------------------------------------------------------------------------------------------------------------------------------------------------------------------------------------------------|----------------------------------------|------------------------------------|----------------------------------------|-------|------------|----------------------------------|--|--|--|--|
| B1                               | <p>How often, if at all, do you believe that your cat</p> <p>a) hunts outside for prey ?</p> <p>b) eats prey that he/she has caught?</p>                                                                                                                                                                                                                                                                               |                                        |                                    |                                        |       |            |                                  |  |  |  |  |
|                                  | <b>Tick one box per row</b>                                                                                                                                                                                                                                                                                                                                                                                            |                                        |                                    |                                        |       |            |                                  |  |  |  |  |
|                                  | <table border="1" style="width: 100%; border-collapse: collapse;"> <tr> <td style="width: 20%; padding: 5px;">Most days</td> <td style="width: 20%; padding: 5px;">Quite often<br/>(1-2<br/>times/week)</td> <td style="width: 20%; padding: 5px;">Not very often<br/>(1-3<br/>times/month)</td> <td style="width: 20%; padding: 5px;">Never</td> <td style="width: 20%; padding: 5px;">Don't know</td> </tr> </table> | Most days                              | Quite often<br>(1-2<br>times/week) | Not very often<br>(1-3<br>times/month) | Never | Don't know |                                  |  |  |  |  |
| Most days                        | Quite often<br>(1-2<br>times/week)                                                                                                                                                                                                                                                                                                                                                                                     | Not very often<br>(1-3<br>times/month) | Never                              | Don't know                             |       |            |                                  |  |  |  |  |
|                                  | <table border="1" style="width: 100%; border-collapse: collapse;"> <tr> <td style="width: 30%; padding: 5px;">Hunts outside for prey</td> <td style="width: 20%;"></td> <td style="width: 20%;"></td> <td style="width: 20%;"></td> <td style="width: 20%;"></td> </tr> <tr> <td style="padding: 5px;">Eats prey that he/she has caught</td> <td></td> <td></td> <td></td> <td></td> </tr> </table>                    | Hunts outside for prey                 |                                    |                                        |       |            | Eats prey that he/she has caught |  |  |  |  |
| Hunts outside for prey           |                                                                                                                                                                                                                                                                                                                                                                                                                        |                                        |                                    |                                        |       |            |                                  |  |  |  |  |
| Eats prey that he/she has caught |                                                                                                                                                                                                                                                                                                                                                                                                                        |                                        |                                    |                                        |       |            |                                  |  |  |  |  |

|                                                                  |                                                                                                                                                                                                                                                                                                                                                                                                                                                                                                         |                                          |  |                                                                  |  |                    |  |                                                |  |
|------------------------------------------------------------------|---------------------------------------------------------------------------------------------------------------------------------------------------------------------------------------------------------------------------------------------------------------------------------------------------------------------------------------------------------------------------------------------------------------------------------------------------------------------------------------------------------|------------------------------------------|--|------------------------------------------------------------------|--|--------------------|--|------------------------------------------------|--|
| B2                                                               | <p>Which of these statements best describes your cat's indoor/outdoor access?</p>                                                                                                                                                                                                                                                                                                                                                                                                                       |                                          |  |                                                                  |  |                    |  |                                                |  |
|                                                                  | <b>Tick one box</b>                                                                                                                                                                                                                                                                                                                                                                                                                                                                                     |                                          |  |                                                                  |  |                    |  |                                                |  |
|                                                                  | <table border="1" style="width: 100%; border-collapse: collapse;"> <tr> <td style="width: 80%; padding: 5px;">Inside only – cat is not allowed outside</td> <td style="width: 20%;"></td> </tr> <tr> <td style="padding: 5px;">Inside only – cat only goes out into enclosed 'run' or on a lead</td> <td></td> </tr> <tr> <td style="padding: 5px;">Inside and outside</td> <td></td> </tr> <tr> <td style="padding: 5px;">Outside only – cat is not allowed in the house</td> <td></td> </tr> </table> | Inside only – cat is not allowed outside |  | Inside only – cat only goes out into enclosed 'run' or on a lead |  | Inside and outside |  | Outside only – cat is not allowed in the house |  |
| Inside only – cat is not allowed outside                         |                                                                                                                                                                                                                                                                                                                                                                                                                                                                                                         |                                          |  |                                                                  |  |                    |  |                                                |  |
| Inside only – cat only goes out into enclosed 'run' or on a lead |                                                                                                                                                                                                                                                                                                                                                                                                                                                                                                         |                                          |  |                                                                  |  |                    |  |                                                |  |
| Inside and outside                                               |                                                                                                                                                                                                                                                                                                                                                                                                                                                                                                         |                                          |  |                                                                  |  |                    |  |                                                |  |
| Outside only – cat is not allowed in the house                   |                                                                                                                                                                                                                                                                                                                                                                                                                                                                                                         |                                          |  |                                                                  |  |                    |  |                                                |  |
|                                                                  | <p><i>If 'inside only', please go to section C.</i></p> <p><i>If 'inside and outside', please continue with question B3.</i></p> <p><i>If 'outside only', please go to question B4.</i></p>                                                                                                                                                                                                                                                                                                             |                                          |  |                                                                  |  |                    |  |                                                |  |

|                                                                               |                                                                                                                                                                                                                                                                                                                                                                                                                                                                                                                                                                                                                                                                                         |                                        |  |                                                                               |  |                                                                |  |                                                                               |  |                                       |  |
|-------------------------------------------------------------------------------|-----------------------------------------------------------------------------------------------------------------------------------------------------------------------------------------------------------------------------------------------------------------------------------------------------------------------------------------------------------------------------------------------------------------------------------------------------------------------------------------------------------------------------------------------------------------------------------------------------------------------------------------------------------------------------------------|----------------------------------------|--|-------------------------------------------------------------------------------|--|----------------------------------------------------------------|--|-------------------------------------------------------------------------------|--|---------------------------------------|--|
| B3                                                                            | <p>Which of these statements best describes how much time your cat currently spends outside, <b>when he/she has unrestricted access to the outside?</b></p>                                                                                                                                                                                                                                                                                                                                                                                                                                                                                                                             |                                        |  |                                                                               |  |                                                                |  |                                                                               |  |                                       |  |
|                                                                               | <b>Tick one box</b>                                                                                                                                                                                                                                                                                                                                                                                                                                                                                                                                                                                                                                                                     |                                        |  |                                                                               |  |                                                                |  |                                                                               |  |                                       |  |
|                                                                               | <table border="1" style="width: 100%; border-collapse: collapse;"> <tr> <td style="width: 80%; padding: 5px;">He/she hardly ever spends time outside</td> <td style="width: 20%;"></td> </tr> <tr> <td style="padding: 5px;">He/she spends a little time outside, but most of his/her time is spent inside</td> <td></td> </tr> <tr> <td style="padding: 5px;">He/she spends roughly equal amounts of time inside and outside</td> <td></td> </tr> <tr> <td style="padding: 5px;">He/she spends a little time inside, but most of his/her time is spent outside</td> <td></td> </tr> <tr> <td style="padding: 5px;">He/she hardly ever spends time inside</td> <td></td> </tr> </table> | He/she hardly ever spends time outside |  | He/she spends a little time outside, but most of his/her time is spent inside |  | He/she spends roughly equal amounts of time inside and outside |  | He/she spends a little time inside, but most of his/her time is spent outside |  | He/she hardly ever spends time inside |  |
| He/she hardly ever spends time outside                                        |                                                                                                                                                                                                                                                                                                                                                                                                                                                                                                                                                                                                                                                                                         |                                        |  |                                                                               |  |                                                                |  |                                                                               |  |                                       |  |
| He/she spends a little time outside, but most of his/her time is spent inside |                                                                                                                                                                                                                                                                                                                                                                                                                                                                                                                                                                                                                                                                                         |                                        |  |                                                                               |  |                                                                |  |                                                                               |  |                                       |  |
| He/she spends roughly equal amounts of time inside and outside                |                                                                                                                                                                                                                                                                                                                                                                                                                                                                                                                                                                                                                                                                                         |                                        |  |                                                                               |  |                                                                |  |                                                                               |  |                                       |  |
| He/she spends a little time inside, but most of his/her time is spent outside |                                                                                                                                                                                                                                                                                                                                                                                                                                                                                                                                                                                                                                                                                         |                                        |  |                                                                               |  |                                                                |  |                                                                               |  |                                       |  |
| He/she hardly ever spends time inside                                         |                                                                                                                                                                                                                                                                                                                                                                                                                                                                                                                                                                                                                                                                                         |                                        |  |                                                                               |  |                                                                |  |                                                                               |  |                                       |  |

|                                                 |                                                                                                                                                                                                                                                                                                                                                                                                                                                                 |                                   |  |                                                 |  |                 |  |                                  |  |
|-------------------------------------------------|-----------------------------------------------------------------------------------------------------------------------------------------------------------------------------------------------------------------------------------------------------------------------------------------------------------------------------------------------------------------------------------------------------------------------------------------------------------------|-----------------------------------|--|-------------------------------------------------|--|-----------------|--|----------------------------------|--|
| B4                                              | <p>To what extent does your cat have access to outdoor space beyond your garden?</p>                                                                                                                                                                                                                                                                                                                                                                            |                                   |  |                                                 |  |                 |  |                                  |  |
|                                                 | <b>Tick one box</b>                                                                                                                                                                                                                                                                                                                                                                                                                                             |                                   |  |                                                 |  |                 |  |                                  |  |
|                                                 | <table border="1" style="width: 100%; border-collapse: collapse;"> <tr> <td style="width: 80%; padding: 5px;">Restricted at all times by a lead</td> <td style="width: 20%;"></td> </tr> <tr> <td style="padding: 5px;">Restricted to the garden by a "cat proof" fence</td> <td></td> </tr> <tr> <td style="padding: 5px;">No restrictions</td> <td></td> </tr> <tr> <td style="padding: 5px;">Other (please specify):<br/>.....</td> <td></td> </tr> </table> | Restricted at all times by a lead |  | Restricted to the garden by a "cat proof" fence |  | No restrictions |  | Other (please specify):<br>..... |  |
| Restricted at all times by a lead               |                                                                                                                                                                                                                                                                                                                                                                                                                                                                 |                                   |  |                                                 |  |                 |  |                                  |  |
| Restricted to the garden by a "cat proof" fence |                                                                                                                                                                                                                                                                                                                                                                                                                                                                 |                                   |  |                                                 |  |                 |  |                                  |  |
| No restrictions                                 |                                                                                                                                                                                                                                                                                                                                                                                                                                                                 |                                   |  |                                                 |  |                 |  |                                  |  |
| Other (please specify):<br>.....                |                                                                                                                                                                                                                                                                                                                                                                                                                                                                 |                                   |  |                                                 |  |                 |  |                                  |  |

## SECTION C: About your cat's diet

*Many of these questions will be familiar as we would like to find out about any changes in your cat's diet, appetite and food preferences.*

|    |                                                                                                     |                                                |                                                  |                               |                   |
|----|-----------------------------------------------------------------------------------------------------|------------------------------------------------|--------------------------------------------------|-------------------------------|-------------------|
| C1 | Which of the following sources of water do you know, or think, that your 'Bristol cat' drinks from? | <b><i>Tick all that apply</i></b>              |                                                  |                               |                   |
|    | Bowl of unfiltered tap water                                                                        |                                                |                                                  |                               |                   |
|    | Bowl of filtered tap water                                                                          |                                                |                                                  |                               |                   |
|    | Bowl of mineral water                                                                               |                                                |                                                  |                               |                   |
|    | Cat drinking fountain – filtered tap water                                                          |                                                |                                                  |                               |                   |
|    | Cat drinking fountain – unfiltered tap water                                                        |                                                |                                                  |                               |                   |
|    | Toilet                                                                                              |                                                |                                                  |                               |                   |
|    | Running tap                                                                                         |                                                |                                                  |                               |                   |
|    | Outside source (stream, pond, puddles, etc)                                                         |                                                |                                                  |                               |                   |
| C2 | How much do you feed your cat the following types of food?                                          |                                                |                                                  |                               |                   |
|    | <b><i>Tick one box per row</i></b>                                                                  |                                                |                                                  |                               |                   |
|    | <i>Only food in diet</i>                                                                            | <i>Major part (half or more) of daily diet</i> | <i>Minor part (less than half) of daily diet</i> | <i>Only feed occasionally</i> | <i>Never feed</i> |
|    | Commercial wet <b>adult</b> cat food (e.g. tins, pouches, foil packs)                               |                                                |                                                  |                               |                   |
|    | Commercial <b>adult</b> dry food (e.g. biscuits, kibbles)                                           |                                                |                                                  |                               |                   |
|    | Uncooked/raw fresh food (e.g. fish, chicken)                                                        |                                                |                                                  |                               |                   |
|    | Cooked fresh food (e.g. fish, chicken)                                                              |                                                |                                                  |                               |                   |
|    | Cow's milk/cream                                                                                    |                                                |                                                  |                               |                   |
|    | Cat milk                                                                                            |                                                |                                                  |                               |                   |

C3 Now, using the label on your cat's commercial wet food (e.g. tins, pouches, foil packs), please estimate which of these phrases best describes the total weight of commercial wet food that you think your cat eats each day.

|                                                                                  | <b>Tick one box</b> |
|----------------------------------------------------------------------------------|---------------------|
| None                                                                             |                     |
| 100g (e.g. one pouch or quarter of a standard-sized tin)                         |                     |
| 150g (e.g. one and a half pouches, or just over a third of a standard-sized tin) |                     |
| 200g (e.g. two pouches or half a standard-sized tin)                             |                     |
| 250g (e.g. two and a half pouches, or nearly two-thirds of a standard-sized tin) |                     |
| 300g (e.g. three pouches, or three-quarters of a standard-sized tin)             |                     |
| Other ( <i>please specify</i> ):                                                 |                     |

C4 Please can you estimate (preferably using your kitchen scales) the weight (in grams) of dry food (e.g. biscuits, kibbles) that you think your cat eats each day, and enter this amount below. (*If your cat does not have dry food, please enter "0".*)

.....grams

Is this an accurate or estimated weight?

|          |  |
|----------|--|
| Accurate |  |
| Estimate |  |

C5 If your cat receives home-prepared food (e.g. fresh fish), please describe what you would typically feed per day:

Please include information on the type (i.e. cut of meat, fish), preparation method and amount.

C6 If you feed your cat commercial cat food and you mainly feed one or two brands (e.g Whiskas Tasty Textures / Felix Sensations etc, dry or tinned), what brands and varieties are they?

|          |  |
|----------|--|
| Brand:   |  |
| Variety: |  |
| Brand:   |  |
| Variety: |  |

C7

If you use 'wet food', which of the following do you usually feed?

|                                  | <b>Tick all that apply</b> |
|----------------------------------|----------------------------|
| N/A, do not feed wet food        |                            |
| Tins                             |                            |
| Pouches/sachets                  |                            |
| It varies                        |                            |
| Meat/fish in gravy               |                            |
| Meat/fish in jelly               |                            |
| Meat/fish pate                   |                            |
| Meat/fish Supermeat / Meaty Loaf |                            |
| Other (please specify):          |                            |

C8

Using the following instructions, please assess the body condition of your 'Bristol Cat' and indicate the body condition score below:

To work out your cat's individual body condition score, you need to do three checks:

1. Rib Check: Run both your hands, palms facedown across your cat's ribcage on either side
2. Profile Check: View your standing cat from a side-on angle, this is best done if you are level with your pet
3. Overhead Check: Look down at your standing cat from an overhead angle

**Pet Size-O-Meter**

**Size-O-Meter Score:**

| Score | Description                                               | Characteristics                                                                                                                                                                                                                                                                                   |
|-------|-----------------------------------------------------------|---------------------------------------------------------------------------------------------------------------------------------------------------------------------------------------------------------------------------------------------------------------------------------------------------|
| 1     | <b>Very Thin</b><br>More than 20% below ideal body weight | <ul style="list-style-type: none"> <li>Ribs, spine &amp; hip bones are very easily seen (in short haired pets)</li> <li>Pronounced waist</li> <li>Obvious loss of muscle mass with no belly fat</li> </ul>                                                                                        |
| 2     | <b>Thin</b><br>Between 10-20% below ideal body weight     | <ul style="list-style-type: none"> <li>Ribs, spine and hip bones easily visible</li> <li>Obvious waist</li> <li>Very little belly fat</li> </ul>                                                                                                                                                  |
| 3     | <b>Ideal</b>                                              | <ul style="list-style-type: none"> <li>Ribs, spine and hip bones easily felt</li> <li>Visible waist</li> <li>A small amount of belly fat</li> </ul>                                                                                                                                               |
| 4     | <b>Overweight</b><br>10-15% above ideal body weight       | <ul style="list-style-type: none"> <li>Ribs, spine and hip bones are hard to feel</li> <li>No defined waist</li> <li>Slightly sagging belly</li> </ul>                                                                                                                                            |
| 5     | <b>Obese</b><br>More than 15% above ideal body weight     | <ul style="list-style-type: none"> <li>Ribs, spine and hip bones are extremely difficult to feel under a padding of fat</li> <li>No waist can be seen</li> <li>Heavy fat pads on lower back and legs and an obvious sagging belly - skin rolls may sway from side to side when walking</li> </ul> |

■ Your pet is a healthy weight. 
 ■ Seek advice about your pet's weight. 
 ■ Seek advice as your pet could be at risk.

**Please note**  
There are some cases where the natural characteristics of your cat may mean this simple system does not translate as easily. For example, if your cat has a long coat it may be difficult to judge the shape. There are also some breeds of cats, such as the Maine Coon, that are generally larger than the average moggie - however they should still have the same body shape. If you need help using this tool, download a hard copy version and take it to your local vet or pet care professional for advice.

Derived from BCSC validated by Larlomme DP. Development and validation of a body condition score system for cats: A clinical tool. Feline Practice 18(7), 25-37. Larlomme DP, Hume E, Harrison J. Evaluation of zoonotic measures as an assessment of body composition of dogs and cats. Compendium 2001, 23(5), pp119-128

**pfma**  
pet food manufacturers' association  
[www.pfma.org.uk](http://www.pfma.org.uk)

Source: [www.pfma.org.uk/assets/images/general/file/PFMA%20Cat%20PSOM%20Final%20Web%20Version%20070809.pdf](http://www.pfma.org.uk/assets/images/general/file/PFMA%20Cat%20PSOM%20Final%20Web%20Version%20070809.pdf)

Body condition score of 'Bristol Cat': .....

## SECTION D: About your cat's health and veterinary contact

|                                                              |                                                                                                                                                                                                                                                                                                                                                                                                                                                                                                                                                                                                                                                                                                                                                                                                                                                                                                                                                                                                                                                                                                                                                                                                                                                                                                                                                                                                                                                                                                                                                                                                                                                                                                                                                                                                                                                                                                                                                                                                                                                                                                                                                                                                                                                                                                                                                                                                                                                                                                                                                                                                                                                                                                                                                                                                                                                                                                                                                                                                                                                                                                                                                                                                                                                                                                                                                                                                                                                                                                                                                                                                                                        |                            |  |                              |  |                                        |  |              |  |                    |  |             |  |               |  |           |  |                 |  |                |  |                 |  |                |  |                    |  |                 |  |         |  |                     |  |                              |  |                                                  |  |                                                          |  |                                   |  |                                |  |                                                              |  |                                                      |  |                     |  |           |  |                  |  |                  |  |                    |  |                  |  |             |  |                                   |  |
|--------------------------------------------------------------|----------------------------------------------------------------------------------------------------------------------------------------------------------------------------------------------------------------------------------------------------------------------------------------------------------------------------------------------------------------------------------------------------------------------------------------------------------------------------------------------------------------------------------------------------------------------------------------------------------------------------------------------------------------------------------------------------------------------------------------------------------------------------------------------------------------------------------------------------------------------------------------------------------------------------------------------------------------------------------------------------------------------------------------------------------------------------------------------------------------------------------------------------------------------------------------------------------------------------------------------------------------------------------------------------------------------------------------------------------------------------------------------------------------------------------------------------------------------------------------------------------------------------------------------------------------------------------------------------------------------------------------------------------------------------------------------------------------------------------------------------------------------------------------------------------------------------------------------------------------------------------------------------------------------------------------------------------------------------------------------------------------------------------------------------------------------------------------------------------------------------------------------------------------------------------------------------------------------------------------------------------------------------------------------------------------------------------------------------------------------------------------------------------------------------------------------------------------------------------------------------------------------------------------------------------------------------------------------------------------------------------------------------------------------------------------------------------------------------------------------------------------------------------------------------------------------------------------------------------------------------------------------------------------------------------------------------------------------------------------------------------------------------------------------------------------------------------------------------------------------------------------------------------------------------------------------------------------------------------------------------------------------------------------------------------------------------------------------------------------------------------------------------------------------------------------------------------------------------------------------------------------------------------------------------------------------------------------------------------------------------------------|----------------------------|--|------------------------------|--|----------------------------------------|--|--------------|--|--------------------|--|-------------|--|---------------|--|-----------|--|-----------------|--|----------------|--|-----------------|--|----------------|--|--------------------|--|-----------------|--|---------|--|---------------------|--|------------------------------|--|--------------------------------------------------|--|----------------------------------------------------------|--|-----------------------------------|--|--------------------------------|--|--------------------------------------------------------------|--|------------------------------------------------------|--|---------------------|--|-----------|--|------------------|--|------------------|--|--------------------|--|------------------|--|-------------|--|-----------------------------------|--|
| D1                                                           | Has your cat visited a veterinary practice during the last <b>12 months</b> ? <table border="1" style="margin-left: auto; margin-right: auto; border-collapse: collapse;"> <tr> <td colspan="2" style="text-align: center; padding: 2px;"><b>Tick one box</b></td> </tr> <tr> <td style="padding: 2px;">Yes</td> <td style="width: 40px; height: 20px;"></td> </tr> <tr> <td style="padding: 2px;">No</td> <td style="width: 40px; height: 20px;"></td> </tr> </table> <p><b>If 'No', go to D5.</b></p>                                                                                                                                                                                                                                                                                                                                                                                                                                                                                                                                                                                                                                                                                                                                                                                                                                                                                                                                                                                                                                                                                                                                                                                                                                                                                                                                                                                                                                                                                                                                                                                                                                                                                                                                                                                                                                                                                                                                                                                                                                                                                                                                                                                                                                                                                                                                                                                                                                                                                                                                                                                                                                                                                                                                                                                                                                                                                                                                                                                                                                                                                                                                | <b>Tick one box</b>        |  | Yes                          |  | No                                     |  |              |  |                    |  |             |  |               |  |           |  |                 |  |                |  |                 |  |                |  |                    |  |                 |  |         |  |                     |  |                              |  |                                                  |  |                                                          |  |                                   |  |                                |  |                                                              |  |                                                      |  |                     |  |           |  |                  |  |                  |  |                    |  |                  |  |             |  |                                   |  |
| <b>Tick one box</b>                                          |                                                                                                                                                                                                                                                                                                                                                                                                                                                                                                                                                                                                                                                                                                                                                                                                                                                                                                                                                                                                                                                                                                                                                                                                                                                                                                                                                                                                                                                                                                                                                                                                                                                                                                                                                                                                                                                                                                                                                                                                                                                                                                                                                                                                                                                                                                                                                                                                                                                                                                                                                                                                                                                                                                                                                                                                                                                                                                                                                                                                                                                                                                                                                                                                                                                                                                                                                                                                                                                                                                                                                                                                                                        |                            |  |                              |  |                                        |  |              |  |                    |  |             |  |               |  |           |  |                 |  |                |  |                 |  |                |  |                    |  |                 |  |         |  |                     |  |                              |  |                                                  |  |                                                          |  |                                   |  |                                |  |                                                              |  |                                                      |  |                     |  |           |  |                  |  |                  |  |                    |  |                  |  |             |  |                                   |  |
| Yes                                                          |                                                                                                                                                                                                                                                                                                                                                                                                                                                                                                                                                                                                                                                                                                                                                                                                                                                                                                                                                                                                                                                                                                                                                                                                                                                                                                                                                                                                                                                                                                                                                                                                                                                                                                                                                                                                                                                                                                                                                                                                                                                                                                                                                                                                                                                                                                                                                                                                                                                                                                                                                                                                                                                                                                                                                                                                                                                                                                                                                                                                                                                                                                                                                                                                                                                                                                                                                                                                                                                                                                                                                                                                                                        |                            |  |                              |  |                                        |  |              |  |                    |  |             |  |               |  |           |  |                 |  |                |  |                 |  |                |  |                    |  |                 |  |         |  |                     |  |                              |  |                                                  |  |                                                          |  |                                   |  |                                |  |                                                              |  |                                                      |  |                     |  |           |  |                  |  |                  |  |                    |  |                  |  |             |  |                                   |  |
| No                                                           |                                                                                                                                                                                                                                                                                                                                                                                                                                                                                                                                                                                                                                                                                                                                                                                                                                                                                                                                                                                                                                                                                                                                                                                                                                                                                                                                                                                                                                                                                                                                                                                                                                                                                                                                                                                                                                                                                                                                                                                                                                                                                                                                                                                                                                                                                                                                                                                                                                                                                                                                                                                                                                                                                                                                                                                                                                                                                                                                                                                                                                                                                                                                                                                                                                                                                                                                                                                                                                                                                                                                                                                                                                        |                            |  |                              |  |                                        |  |              |  |                    |  |             |  |               |  |           |  |                 |  |                |  |                 |  |                |  |                    |  |                 |  |         |  |                     |  |                              |  |                                                  |  |                                                          |  |                                   |  |                                |  |                                                              |  |                                                      |  |                     |  |           |  |                  |  |                  |  |                    |  |                  |  |             |  |                                   |  |
| D2                                                           | What was the purpose of this visit / these visits? <table border="1" style="margin-left: auto; margin-right: auto; border-collapse: collapse;"> <tr> <td colspan="2" style="text-align: center; padding: 2px;"><b>Tick all that apply</b></td> </tr> <tr><td style="padding: 2px;">Routine general health check</td><td style="width: 40px; height: 20px;"></td></tr> <tr><td style="padding: 2px;">Slimming club / weight watchers clinic</td><td style="width: 40px; height: 20px;"></td></tr> <tr><td style="padding: 2px;">Dental check</td><td style="width: 40px; height: 20px;"></td></tr> <tr><td style="padding: 2px;">Behavioural advice</td><td style="width: 40px; height: 20px;"></td></tr> <tr><td style="padding: 2px;">Vaccination</td><td style="width: 40px; height: 20px;"></td></tr> <tr><td style="padding: 2px;">Microchipping</td><td style="width: 40px; height: 20px;"></td></tr> <tr><td style="padding: 2px;">Neutering</td><td style="width: 40px; height: 20px;"></td></tr> <tr><td style="padding: 2px;">Flea prevention</td><td style="width: 40px; height: 20px;"></td></tr> <tr><td style="padding: 2px;">To treat fleas</td><td style="width: 40px; height: 20px;"></td></tr> <tr><td style="padding: 2px;">Worm prevention</td><td style="width: 40px; height: 20px;"></td></tr> <tr><td style="padding: 2px;">To treat worms</td><td style="width: 40px; height: 20px;"></td></tr> <tr><td style="padding: 2px;">Abscess / cat bite</td><td style="width: 40px; height: 20px;"></td></tr> <tr><td style="padding: 2px;">Attacked by dog</td><td style="width: 40px; height: 20px;"></td></tr> <tr><td style="padding: 2px;">Cat flu</td><td style="width: 40px; height: 20px;"></td></tr> <tr><td style="padding: 2px;">Coughing / wheezing</td><td style="width: 40px; height: 20px;"></td></tr> <tr><td style="padding: 2px;">Ear problem (e.g. ear mites)</td><td style="width: 40px; height: 20px;"></td></tr> <tr><td style="padding: 2px;">Urinary problem (e.g. cystitis, blocked bladder)</td><td style="width: 40px; height: 20px;"></td></tr> <tr><td style="padding: 2px;">Skin problem (e.g. itchy, excessive grooming, hair loss)</td><td style="width: 40px; height: 20px;"></td></tr> <tr><td style="padding: 2px;">Eye problem (e.g. conjunctivitis)</td><td style="width: 40px; height: 20px;"></td></tr> <tr><td style="padding: 2px;">Dental / tooth / mouth problem</td><td style="width: 40px; height: 20px;"></td></tr> <tr><td style="padding: 2px;">Lameness / limb problem, including broken or dislocated bone</td><td style="width: 40px; height: 20px;"></td></tr> <tr><td style="padding: 2px;">Checking / investigating heart problem (e.g. murmur)</td><td style="width: 40px; height: 20px;"></td></tr> <tr><td style="padding: 2px;">Vomiting / sickness</td><td style="width: 40px; height: 20px;"></td></tr> <tr><td style="padding: 2px;">Diarrhoea</td><td style="width: 40px; height: 20px;"></td></tr> <tr><td style="padding: 2px;">Cat 'off colour'</td><td style="width: 40px; height: 20px;"></td></tr> <tr><td style="padding: 2px;">Reduced appetite</td><td style="width: 40px; height: 20px;"></td></tr> <tr><td style="padding: 2px;">Increased appetite</td><td style="width: 40px; height: 20px;"></td></tr> <tr><td style="padding: 2px;">Increased thirst</td><td style="width: 40px; height: 20px;"></td></tr> <tr><td style="padding: 2px;">Weight loss</td><td style="width: 40px; height: 20px;"></td></tr> <tr><td style="padding: 2px;">Other (please give full details):</td><td style="width: 40px; height: 20px;"></td></tr> </table> | <b>Tick all that apply</b> |  | Routine general health check |  | Slimming club / weight watchers clinic |  | Dental check |  | Behavioural advice |  | Vaccination |  | Microchipping |  | Neutering |  | Flea prevention |  | To treat fleas |  | Worm prevention |  | To treat worms |  | Abscess / cat bite |  | Attacked by dog |  | Cat flu |  | Coughing / wheezing |  | Ear problem (e.g. ear mites) |  | Urinary problem (e.g. cystitis, blocked bladder) |  | Skin problem (e.g. itchy, excessive grooming, hair loss) |  | Eye problem (e.g. conjunctivitis) |  | Dental / tooth / mouth problem |  | Lameness / limb problem, including broken or dislocated bone |  | Checking / investigating heart problem (e.g. murmur) |  | Vomiting / sickness |  | Diarrhoea |  | Cat 'off colour' |  | Reduced appetite |  | Increased appetite |  | Increased thirst |  | Weight loss |  | Other (please give full details): |  |
| <b>Tick all that apply</b>                                   |                                                                                                                                                                                                                                                                                                                                                                                                                                                                                                                                                                                                                                                                                                                                                                                                                                                                                                                                                                                                                                                                                                                                                                                                                                                                                                                                                                                                                                                                                                                                                                                                                                                                                                                                                                                                                                                                                                                                                                                                                                                                                                                                                                                                                                                                                                                                                                                                                                                                                                                                                                                                                                                                                                                                                                                                                                                                                                                                                                                                                                                                                                                                                                                                                                                                                                                                                                                                                                                                                                                                                                                                                                        |                            |  |                              |  |                                        |  |              |  |                    |  |             |  |               |  |           |  |                 |  |                |  |                 |  |                |  |                    |  |                 |  |         |  |                     |  |                              |  |                                                  |  |                                                          |  |                                   |  |                                |  |                                                              |  |                                                      |  |                     |  |           |  |                  |  |                  |  |                    |  |                  |  |             |  |                                   |  |
| Routine general health check                                 |                                                                                                                                                                                                                                                                                                                                                                                                                                                                                                                                                                                                                                                                                                                                                                                                                                                                                                                                                                                                                                                                                                                                                                                                                                                                                                                                                                                                                                                                                                                                                                                                                                                                                                                                                                                                                                                                                                                                                                                                                                                                                                                                                                                                                                                                                                                                                                                                                                                                                                                                                                                                                                                                                                                                                                                                                                                                                                                                                                                                                                                                                                                                                                                                                                                                                                                                                                                                                                                                                                                                                                                                                                        |                            |  |                              |  |                                        |  |              |  |                    |  |             |  |               |  |           |  |                 |  |                |  |                 |  |                |  |                    |  |                 |  |         |  |                     |  |                              |  |                                                  |  |                                                          |  |                                   |  |                                |  |                                                              |  |                                                      |  |                     |  |           |  |                  |  |                  |  |                    |  |                  |  |             |  |                                   |  |
| Slimming club / weight watchers clinic                       |                                                                                                                                                                                                                                                                                                                                                                                                                                                                                                                                                                                                                                                                                                                                                                                                                                                                                                                                                                                                                                                                                                                                                                                                                                                                                                                                                                                                                                                                                                                                                                                                                                                                                                                                                                                                                                                                                                                                                                                                                                                                                                                                                                                                                                                                                                                                                                                                                                                                                                                                                                                                                                                                                                                                                                                                                                                                                                                                                                                                                                                                                                                                                                                                                                                                                                                                                                                                                                                                                                                                                                                                                                        |                            |  |                              |  |                                        |  |              |  |                    |  |             |  |               |  |           |  |                 |  |                |  |                 |  |                |  |                    |  |                 |  |         |  |                     |  |                              |  |                                                  |  |                                                          |  |                                   |  |                                |  |                                                              |  |                                                      |  |                     |  |           |  |                  |  |                  |  |                    |  |                  |  |             |  |                                   |  |
| Dental check                                                 |                                                                                                                                                                                                                                                                                                                                                                                                                                                                                                                                                                                                                                                                                                                                                                                                                                                                                                                                                                                                                                                                                                                                                                                                                                                                                                                                                                                                                                                                                                                                                                                                                                                                                                                                                                                                                                                                                                                                                                                                                                                                                                                                                                                                                                                                                                                                                                                                                                                                                                                                                                                                                                                                                                                                                                                                                                                                                                                                                                                                                                                                                                                                                                                                                                                                                                                                                                                                                                                                                                                                                                                                                                        |                            |  |                              |  |                                        |  |              |  |                    |  |             |  |               |  |           |  |                 |  |                |  |                 |  |                |  |                    |  |                 |  |         |  |                     |  |                              |  |                                                  |  |                                                          |  |                                   |  |                                |  |                                                              |  |                                                      |  |                     |  |           |  |                  |  |                  |  |                    |  |                  |  |             |  |                                   |  |
| Behavioural advice                                           |                                                                                                                                                                                                                                                                                                                                                                                                                                                                                                                                                                                                                                                                                                                                                                                                                                                                                                                                                                                                                                                                                                                                                                                                                                                                                                                                                                                                                                                                                                                                                                                                                                                                                                                                                                                                                                                                                                                                                                                                                                                                                                                                                                                                                                                                                                                                                                                                                                                                                                                                                                                                                                                                                                                                                                                                                                                                                                                                                                                                                                                                                                                                                                                                                                                                                                                                                                                                                                                                                                                                                                                                                                        |                            |  |                              |  |                                        |  |              |  |                    |  |             |  |               |  |           |  |                 |  |                |  |                 |  |                |  |                    |  |                 |  |         |  |                     |  |                              |  |                                                  |  |                                                          |  |                                   |  |                                |  |                                                              |  |                                                      |  |                     |  |           |  |                  |  |                  |  |                    |  |                  |  |             |  |                                   |  |
| Vaccination                                                  |                                                                                                                                                                                                                                                                                                                                                                                                                                                                                                                                                                                                                                                                                                                                                                                                                                                                                                                                                                                                                                                                                                                                                                                                                                                                                                                                                                                                                                                                                                                                                                                                                                                                                                                                                                                                                                                                                                                                                                                                                                                                                                                                                                                                                                                                                                                                                                                                                                                                                                                                                                                                                                                                                                                                                                                                                                                                                                                                                                                                                                                                                                                                                                                                                                                                                                                                                                                                                                                                                                                                                                                                                                        |                            |  |                              |  |                                        |  |              |  |                    |  |             |  |               |  |           |  |                 |  |                |  |                 |  |                |  |                    |  |                 |  |         |  |                     |  |                              |  |                                                  |  |                                                          |  |                                   |  |                                |  |                                                              |  |                                                      |  |                     |  |           |  |                  |  |                  |  |                    |  |                  |  |             |  |                                   |  |
| Microchipping                                                |                                                                                                                                                                                                                                                                                                                                                                                                                                                                                                                                                                                                                                                                                                                                                                                                                                                                                                                                                                                                                                                                                                                                                                                                                                                                                                                                                                                                                                                                                                                                                                                                                                                                                                                                                                                                                                                                                                                                                                                                                                                                                                                                                                                                                                                                                                                                                                                                                                                                                                                                                                                                                                                                                                                                                                                                                                                                                                                                                                                                                                                                                                                                                                                                                                                                                                                                                                                                                                                                                                                                                                                                                                        |                            |  |                              |  |                                        |  |              |  |                    |  |             |  |               |  |           |  |                 |  |                |  |                 |  |                |  |                    |  |                 |  |         |  |                     |  |                              |  |                                                  |  |                                                          |  |                                   |  |                                |  |                                                              |  |                                                      |  |                     |  |           |  |                  |  |                  |  |                    |  |                  |  |             |  |                                   |  |
| Neutering                                                    |                                                                                                                                                                                                                                                                                                                                                                                                                                                                                                                                                                                                                                                                                                                                                                                                                                                                                                                                                                                                                                                                                                                                                                                                                                                                                                                                                                                                                                                                                                                                                                                                                                                                                                                                                                                                                                                                                                                                                                                                                                                                                                                                                                                                                                                                                                                                                                                                                                                                                                                                                                                                                                                                                                                                                                                                                                                                                                                                                                                                                                                                                                                                                                                                                                                                                                                                                                                                                                                                                                                                                                                                                                        |                            |  |                              |  |                                        |  |              |  |                    |  |             |  |               |  |           |  |                 |  |                |  |                 |  |                |  |                    |  |                 |  |         |  |                     |  |                              |  |                                                  |  |                                                          |  |                                   |  |                                |  |                                                              |  |                                                      |  |                     |  |           |  |                  |  |                  |  |                    |  |                  |  |             |  |                                   |  |
| Flea prevention                                              |                                                                                                                                                                                                                                                                                                                                                                                                                                                                                                                                                                                                                                                                                                                                                                                                                                                                                                                                                                                                                                                                                                                                                                                                                                                                                                                                                                                                                                                                                                                                                                                                                                                                                                                                                                                                                                                                                                                                                                                                                                                                                                                                                                                                                                                                                                                                                                                                                                                                                                                                                                                                                                                                                                                                                                                                                                                                                                                                                                                                                                                                                                                                                                                                                                                                                                                                                                                                                                                                                                                                                                                                                                        |                            |  |                              |  |                                        |  |              |  |                    |  |             |  |               |  |           |  |                 |  |                |  |                 |  |                |  |                    |  |                 |  |         |  |                     |  |                              |  |                                                  |  |                                                          |  |                                   |  |                                |  |                                                              |  |                                                      |  |                     |  |           |  |                  |  |                  |  |                    |  |                  |  |             |  |                                   |  |
| To treat fleas                                               |                                                                                                                                                                                                                                                                                                                                                                                                                                                                                                                                                                                                                                                                                                                                                                                                                                                                                                                                                                                                                                                                                                                                                                                                                                                                                                                                                                                                                                                                                                                                                                                                                                                                                                                                                                                                                                                                                                                                                                                                                                                                                                                                                                                                                                                                                                                                                                                                                                                                                                                                                                                                                                                                                                                                                                                                                                                                                                                                                                                                                                                                                                                                                                                                                                                                                                                                                                                                                                                                                                                                                                                                                                        |                            |  |                              |  |                                        |  |              |  |                    |  |             |  |               |  |           |  |                 |  |                |  |                 |  |                |  |                    |  |                 |  |         |  |                     |  |                              |  |                                                  |  |                                                          |  |                                   |  |                                |  |                                                              |  |                                                      |  |                     |  |           |  |                  |  |                  |  |                    |  |                  |  |             |  |                                   |  |
| Worm prevention                                              |                                                                                                                                                                                                                                                                                                                                                                                                                                                                                                                                                                                                                                                                                                                                                                                                                                                                                                                                                                                                                                                                                                                                                                                                                                                                                                                                                                                                                                                                                                                                                                                                                                                                                                                                                                                                                                                                                                                                                                                                                                                                                                                                                                                                                                                                                                                                                                                                                                                                                                                                                                                                                                                                                                                                                                                                                                                                                                                                                                                                                                                                                                                                                                                                                                                                                                                                                                                                                                                                                                                                                                                                                                        |                            |  |                              |  |                                        |  |              |  |                    |  |             |  |               |  |           |  |                 |  |                |  |                 |  |                |  |                    |  |                 |  |         |  |                     |  |                              |  |                                                  |  |                                                          |  |                                   |  |                                |  |                                                              |  |                                                      |  |                     |  |           |  |                  |  |                  |  |                    |  |                  |  |             |  |                                   |  |
| To treat worms                                               |                                                                                                                                                                                                                                                                                                                                                                                                                                                                                                                                                                                                                                                                                                                                                                                                                                                                                                                                                                                                                                                                                                                                                                                                                                                                                                                                                                                                                                                                                                                                                                                                                                                                                                                                                                                                                                                                                                                                                                                                                                                                                                                                                                                                                                                                                                                                                                                                                                                                                                                                                                                                                                                                                                                                                                                                                                                                                                                                                                                                                                                                                                                                                                                                                                                                                                                                                                                                                                                                                                                                                                                                                                        |                            |  |                              |  |                                        |  |              |  |                    |  |             |  |               |  |           |  |                 |  |                |  |                 |  |                |  |                    |  |                 |  |         |  |                     |  |                              |  |                                                  |  |                                                          |  |                                   |  |                                |  |                                                              |  |                                                      |  |                     |  |           |  |                  |  |                  |  |                    |  |                  |  |             |  |                                   |  |
| Abscess / cat bite                                           |                                                                                                                                                                                                                                                                                                                                                                                                                                                                                                                                                                                                                                                                                                                                                                                                                                                                                                                                                                                                                                                                                                                                                                                                                                                                                                                                                                                                                                                                                                                                                                                                                                                                                                                                                                                                                                                                                                                                                                                                                                                                                                                                                                                                                                                                                                                                                                                                                                                                                                                                                                                                                                                                                                                                                                                                                                                                                                                                                                                                                                                                                                                                                                                                                                                                                                                                                                                                                                                                                                                                                                                                                                        |                            |  |                              |  |                                        |  |              |  |                    |  |             |  |               |  |           |  |                 |  |                |  |                 |  |                |  |                    |  |                 |  |         |  |                     |  |                              |  |                                                  |  |                                                          |  |                                   |  |                                |  |                                                              |  |                                                      |  |                     |  |           |  |                  |  |                  |  |                    |  |                  |  |             |  |                                   |  |
| Attacked by dog                                              |                                                                                                                                                                                                                                                                                                                                                                                                                                                                                                                                                                                                                                                                                                                                                                                                                                                                                                                                                                                                                                                                                                                                                                                                                                                                                                                                                                                                                                                                                                                                                                                                                                                                                                                                                                                                                                                                                                                                                                                                                                                                                                                                                                                                                                                                                                                                                                                                                                                                                                                                                                                                                                                                                                                                                                                                                                                                                                                                                                                                                                                                                                                                                                                                                                                                                                                                                                                                                                                                                                                                                                                                                                        |                            |  |                              |  |                                        |  |              |  |                    |  |             |  |               |  |           |  |                 |  |                |  |                 |  |                |  |                    |  |                 |  |         |  |                     |  |                              |  |                                                  |  |                                                          |  |                                   |  |                                |  |                                                              |  |                                                      |  |                     |  |           |  |                  |  |                  |  |                    |  |                  |  |             |  |                                   |  |
| Cat flu                                                      |                                                                                                                                                                                                                                                                                                                                                                                                                                                                                                                                                                                                                                                                                                                                                                                                                                                                                                                                                                                                                                                                                                                                                                                                                                                                                                                                                                                                                                                                                                                                                                                                                                                                                                                                                                                                                                                                                                                                                                                                                                                                                                                                                                                                                                                                                                                                                                                                                                                                                                                                                                                                                                                                                                                                                                                                                                                                                                                                                                                                                                                                                                                                                                                                                                                                                                                                                                                                                                                                                                                                                                                                                                        |                            |  |                              |  |                                        |  |              |  |                    |  |             |  |               |  |           |  |                 |  |                |  |                 |  |                |  |                    |  |                 |  |         |  |                     |  |                              |  |                                                  |  |                                                          |  |                                   |  |                                |  |                                                              |  |                                                      |  |                     |  |           |  |                  |  |                  |  |                    |  |                  |  |             |  |                                   |  |
| Coughing / wheezing                                          |                                                                                                                                                                                                                                                                                                                                                                                                                                                                                                                                                                                                                                                                                                                                                                                                                                                                                                                                                                                                                                                                                                                                                                                                                                                                                                                                                                                                                                                                                                                                                                                                                                                                                                                                                                                                                                                                                                                                                                                                                                                                                                                                                                                                                                                                                                                                                                                                                                                                                                                                                                                                                                                                                                                                                                                                                                                                                                                                                                                                                                                                                                                                                                                                                                                                                                                                                                                                                                                                                                                                                                                                                                        |                            |  |                              |  |                                        |  |              |  |                    |  |             |  |               |  |           |  |                 |  |                |  |                 |  |                |  |                    |  |                 |  |         |  |                     |  |                              |  |                                                  |  |                                                          |  |                                   |  |                                |  |                                                              |  |                                                      |  |                     |  |           |  |                  |  |                  |  |                    |  |                  |  |             |  |                                   |  |
| Ear problem (e.g. ear mites)                                 |                                                                                                                                                                                                                                                                                                                                                                                                                                                                                                                                                                                                                                                                                                                                                                                                                                                                                                                                                                                                                                                                                                                                                                                                                                                                                                                                                                                                                                                                                                                                                                                                                                                                                                                                                                                                                                                                                                                                                                                                                                                                                                                                                                                                                                                                                                                                                                                                                                                                                                                                                                                                                                                                                                                                                                                                                                                                                                                                                                                                                                                                                                                                                                                                                                                                                                                                                                                                                                                                                                                                                                                                                                        |                            |  |                              |  |                                        |  |              |  |                    |  |             |  |               |  |           |  |                 |  |                |  |                 |  |                |  |                    |  |                 |  |         |  |                     |  |                              |  |                                                  |  |                                                          |  |                                   |  |                                |  |                                                              |  |                                                      |  |                     |  |           |  |                  |  |                  |  |                    |  |                  |  |             |  |                                   |  |
| Urinary problem (e.g. cystitis, blocked bladder)             |                                                                                                                                                                                                                                                                                                                                                                                                                                                                                                                                                                                                                                                                                                                                                                                                                                                                                                                                                                                                                                                                                                                                                                                                                                                                                                                                                                                                                                                                                                                                                                                                                                                                                                                                                                                                                                                                                                                                                                                                                                                                                                                                                                                                                                                                                                                                                                                                                                                                                                                                                                                                                                                                                                                                                                                                                                                                                                                                                                                                                                                                                                                                                                                                                                                                                                                                                                                                                                                                                                                                                                                                                                        |                            |  |                              |  |                                        |  |              |  |                    |  |             |  |               |  |           |  |                 |  |                |  |                 |  |                |  |                    |  |                 |  |         |  |                     |  |                              |  |                                                  |  |                                                          |  |                                   |  |                                |  |                                                              |  |                                                      |  |                     |  |           |  |                  |  |                  |  |                    |  |                  |  |             |  |                                   |  |
| Skin problem (e.g. itchy, excessive grooming, hair loss)     |                                                                                                                                                                                                                                                                                                                                                                                                                                                                                                                                                                                                                                                                                                                                                                                                                                                                                                                                                                                                                                                                                                                                                                                                                                                                                                                                                                                                                                                                                                                                                                                                                                                                                                                                                                                                                                                                                                                                                                                                                                                                                                                                                                                                                                                                                                                                                                                                                                                                                                                                                                                                                                                                                                                                                                                                                                                                                                                                                                                                                                                                                                                                                                                                                                                                                                                                                                                                                                                                                                                                                                                                                                        |                            |  |                              |  |                                        |  |              |  |                    |  |             |  |               |  |           |  |                 |  |                |  |                 |  |                |  |                    |  |                 |  |         |  |                     |  |                              |  |                                                  |  |                                                          |  |                                   |  |                                |  |                                                              |  |                                                      |  |                     |  |           |  |                  |  |                  |  |                    |  |                  |  |             |  |                                   |  |
| Eye problem (e.g. conjunctivitis)                            |                                                                                                                                                                                                                                                                                                                                                                                                                                                                                                                                                                                                                                                                                                                                                                                                                                                                                                                                                                                                                                                                                                                                                                                                                                                                                                                                                                                                                                                                                                                                                                                                                                                                                                                                                                                                                                                                                                                                                                                                                                                                                                                                                                                                                                                                                                                                                                                                                                                                                                                                                                                                                                                                                                                                                                                                                                                                                                                                                                                                                                                                                                                                                                                                                                                                                                                                                                                                                                                                                                                                                                                                                                        |                            |  |                              |  |                                        |  |              |  |                    |  |             |  |               |  |           |  |                 |  |                |  |                 |  |                |  |                    |  |                 |  |         |  |                     |  |                              |  |                                                  |  |                                                          |  |                                   |  |                                |  |                                                              |  |                                                      |  |                     |  |           |  |                  |  |                  |  |                    |  |                  |  |             |  |                                   |  |
| Dental / tooth / mouth problem                               |                                                                                                                                                                                                                                                                                                                                                                                                                                                                                                                                                                                                                                                                                                                                                                                                                                                                                                                                                                                                                                                                                                                                                                                                                                                                                                                                                                                                                                                                                                                                                                                                                                                                                                                                                                                                                                                                                                                                                                                                                                                                                                                                                                                                                                                                                                                                                                                                                                                                                                                                                                                                                                                                                                                                                                                                                                                                                                                                                                                                                                                                                                                                                                                                                                                                                                                                                                                                                                                                                                                                                                                                                                        |                            |  |                              |  |                                        |  |              |  |                    |  |             |  |               |  |           |  |                 |  |                |  |                 |  |                |  |                    |  |                 |  |         |  |                     |  |                              |  |                                                  |  |                                                          |  |                                   |  |                                |  |                                                              |  |                                                      |  |                     |  |           |  |                  |  |                  |  |                    |  |                  |  |             |  |                                   |  |
| Lameness / limb problem, including broken or dislocated bone |                                                                                                                                                                                                                                                                                                                                                                                                                                                                                                                                                                                                                                                                                                                                                                                                                                                                                                                                                                                                                                                                                                                                                                                                                                                                                                                                                                                                                                                                                                                                                                                                                                                                                                                                                                                                                                                                                                                                                                                                                                                                                                                                                                                                                                                                                                                                                                                                                                                                                                                                                                                                                                                                                                                                                                                                                                                                                                                                                                                                                                                                                                                                                                                                                                                                                                                                                                                                                                                                                                                                                                                                                                        |                            |  |                              |  |                                        |  |              |  |                    |  |             |  |               |  |           |  |                 |  |                |  |                 |  |                |  |                    |  |                 |  |         |  |                     |  |                              |  |                                                  |  |                                                          |  |                                   |  |                                |  |                                                              |  |                                                      |  |                     |  |           |  |                  |  |                  |  |                    |  |                  |  |             |  |                                   |  |
| Checking / investigating heart problem (e.g. murmur)         |                                                                                                                                                                                                                                                                                                                                                                                                                                                                                                                                                                                                                                                                                                                                                                                                                                                                                                                                                                                                                                                                                                                                                                                                                                                                                                                                                                                                                                                                                                                                                                                                                                                                                                                                                                                                                                                                                                                                                                                                                                                                                                                                                                                                                                                                                                                                                                                                                                                                                                                                                                                                                                                                                                                                                                                                                                                                                                                                                                                                                                                                                                                                                                                                                                                                                                                                                                                                                                                                                                                                                                                                                                        |                            |  |                              |  |                                        |  |              |  |                    |  |             |  |               |  |           |  |                 |  |                |  |                 |  |                |  |                    |  |                 |  |         |  |                     |  |                              |  |                                                  |  |                                                          |  |                                   |  |                                |  |                                                              |  |                                                      |  |                     |  |           |  |                  |  |                  |  |                    |  |                  |  |             |  |                                   |  |
| Vomiting / sickness                                          |                                                                                                                                                                                                                                                                                                                                                                                                                                                                                                                                                                                                                                                                                                                                                                                                                                                                                                                                                                                                                                                                                                                                                                                                                                                                                                                                                                                                                                                                                                                                                                                                                                                                                                                                                                                                                                                                                                                                                                                                                                                                                                                                                                                                                                                                                                                                                                                                                                                                                                                                                                                                                                                                                                                                                                                                                                                                                                                                                                                                                                                                                                                                                                                                                                                                                                                                                                                                                                                                                                                                                                                                                                        |                            |  |                              |  |                                        |  |              |  |                    |  |             |  |               |  |           |  |                 |  |                |  |                 |  |                |  |                    |  |                 |  |         |  |                     |  |                              |  |                                                  |  |                                                          |  |                                   |  |                                |  |                                                              |  |                                                      |  |                     |  |           |  |                  |  |                  |  |                    |  |                  |  |             |  |                                   |  |
| Diarrhoea                                                    |                                                                                                                                                                                                                                                                                                                                                                                                                                                                                                                                                                                                                                                                                                                                                                                                                                                                                                                                                                                                                                                                                                                                                                                                                                                                                                                                                                                                                                                                                                                                                                                                                                                                                                                                                                                                                                                                                                                                                                                                                                                                                                                                                                                                                                                                                                                                                                                                                                                                                                                                                                                                                                                                                                                                                                                                                                                                                                                                                                                                                                                                                                                                                                                                                                                                                                                                                                                                                                                                                                                                                                                                                                        |                            |  |                              |  |                                        |  |              |  |                    |  |             |  |               |  |           |  |                 |  |                |  |                 |  |                |  |                    |  |                 |  |         |  |                     |  |                              |  |                                                  |  |                                                          |  |                                   |  |                                |  |                                                              |  |                                                      |  |                     |  |           |  |                  |  |                  |  |                    |  |                  |  |             |  |                                   |  |
| Cat 'off colour'                                             |                                                                                                                                                                                                                                                                                                                                                                                                                                                                                                                                                                                                                                                                                                                                                                                                                                                                                                                                                                                                                                                                                                                                                                                                                                                                                                                                                                                                                                                                                                                                                                                                                                                                                                                                                                                                                                                                                                                                                                                                                                                                                                                                                                                                                                                                                                                                                                                                                                                                                                                                                                                                                                                                                                                                                                                                                                                                                                                                                                                                                                                                                                                                                                                                                                                                                                                                                                                                                                                                                                                                                                                                                                        |                            |  |                              |  |                                        |  |              |  |                    |  |             |  |               |  |           |  |                 |  |                |  |                 |  |                |  |                    |  |                 |  |         |  |                     |  |                              |  |                                                  |  |                                                          |  |                                   |  |                                |  |                                                              |  |                                                      |  |                     |  |           |  |                  |  |                  |  |                    |  |                  |  |             |  |                                   |  |
| Reduced appetite                                             |                                                                                                                                                                                                                                                                                                                                                                                                                                                                                                                                                                                                                                                                                                                                                                                                                                                                                                                                                                                                                                                                                                                                                                                                                                                                                                                                                                                                                                                                                                                                                                                                                                                                                                                                                                                                                                                                                                                                                                                                                                                                                                                                                                                                                                                                                                                                                                                                                                                                                                                                                                                                                                                                                                                                                                                                                                                                                                                                                                                                                                                                                                                                                                                                                                                                                                                                                                                                                                                                                                                                                                                                                                        |                            |  |                              |  |                                        |  |              |  |                    |  |             |  |               |  |           |  |                 |  |                |  |                 |  |                |  |                    |  |                 |  |         |  |                     |  |                              |  |                                                  |  |                                                          |  |                                   |  |                                |  |                                                              |  |                                                      |  |                     |  |           |  |                  |  |                  |  |                    |  |                  |  |             |  |                                   |  |
| Increased appetite                                           |                                                                                                                                                                                                                                                                                                                                                                                                                                                                                                                                                                                                                                                                                                                                                                                                                                                                                                                                                                                                                                                                                                                                                                                                                                                                                                                                                                                                                                                                                                                                                                                                                                                                                                                                                                                                                                                                                                                                                                                                                                                                                                                                                                                                                                                                                                                                                                                                                                                                                                                                                                                                                                                                                                                                                                                                                                                                                                                                                                                                                                                                                                                                                                                                                                                                                                                                                                                                                                                                                                                                                                                                                                        |                            |  |                              |  |                                        |  |              |  |                    |  |             |  |               |  |           |  |                 |  |                |  |                 |  |                |  |                    |  |                 |  |         |  |                     |  |                              |  |                                                  |  |                                                          |  |                                   |  |                                |  |                                                              |  |                                                      |  |                     |  |           |  |                  |  |                  |  |                    |  |                  |  |             |  |                                   |  |
| Increased thirst                                             |                                                                                                                                                                                                                                                                                                                                                                                                                                                                                                                                                                                                                                                                                                                                                                                                                                                                                                                                                                                                                                                                                                                                                                                                                                                                                                                                                                                                                                                                                                                                                                                                                                                                                                                                                                                                                                                                                                                                                                                                                                                                                                                                                                                                                                                                                                                                                                                                                                                                                                                                                                                                                                                                                                                                                                                                                                                                                                                                                                                                                                                                                                                                                                                                                                                                                                                                                                                                                                                                                                                                                                                                                                        |                            |  |                              |  |                                        |  |              |  |                    |  |             |  |               |  |           |  |                 |  |                |  |                 |  |                |  |                    |  |                 |  |         |  |                     |  |                              |  |                                                  |  |                                                          |  |                                   |  |                                |  |                                                              |  |                                                      |  |                     |  |           |  |                  |  |                  |  |                    |  |                  |  |             |  |                                   |  |
| Weight loss                                                  |                                                                                                                                                                                                                                                                                                                                                                                                                                                                                                                                                                                                                                                                                                                                                                                                                                                                                                                                                                                                                                                                                                                                                                                                                                                                                                                                                                                                                                                                                                                                                                                                                                                                                                                                                                                                                                                                                                                                                                                                                                                                                                                                                                                                                                                                                                                                                                                                                                                                                                                                                                                                                                                                                                                                                                                                                                                                                                                                                                                                                                                                                                                                                                                                                                                                                                                                                                                                                                                                                                                                                                                                                                        |                            |  |                              |  |                                        |  |              |  |                    |  |             |  |               |  |           |  |                 |  |                |  |                 |  |                |  |                    |  |                 |  |         |  |                     |  |                              |  |                                                  |  |                                                          |  |                                   |  |                                |  |                                                              |  |                                                      |  |                     |  |           |  |                  |  |                  |  |                    |  |                  |  |             |  |                                   |  |
| Other (please give full details):                            |                                                                                                                                                                                                                                                                                                                                                                                                                                                                                                                                                                                                                                                                                                                                                                                                                                                                                                                                                                                                                                                                                                                                                                                                                                                                                                                                                                                                                                                                                                                                                                                                                                                                                                                                                                                                                                                                                                                                                                                                                                                                                                                                                                                                                                                                                                                                                                                                                                                                                                                                                                                                                                                                                                                                                                                                                                                                                                                                                                                                                                                                                                                                                                                                                                                                                                                                                                                                                                                                                                                                                                                                                                        |                            |  |                              |  |                                        |  |              |  |                    |  |             |  |               |  |           |  |                 |  |                |  |                 |  |                |  |                    |  |                 |  |         |  |                     |  |                              |  |                                                  |  |                                                          |  |                                   |  |                                |  |                                                              |  |                                                      |  |                     |  |           |  |                  |  |                  |  |                    |  |                  |  |             |  |                                   |  |



D3 Please use this space to provide further details of problems that have led to veterinary visits indicated above. If a vet has made a diagnosis please include this information.

D4 Has your cat had any of the following diagnosed by a vet?

|                 | <b><i>Tick all that apply</i></b> |
|-----------------|-----------------------------------|
| Hyperthyroidism |                                   |
| Heart disease   |                                   |
| Renal failure   |                                   |
| Diabetes        |                                   |
| Cancer          |                                   |
| None of these   |                                   |

D5 Please provide details of any medication (excluding routine flea/worming treatment) that your cat has received during the last 12 months. Information we are interested in includes: name of medication, dose, frequency medication given, date started, date finished (or length of course).

|                                  |                                                                                                                                                                                 |              |                      |                            |                   |
|----------------------------------|---------------------------------------------------------------------------------------------------------------------------------------------------------------------------------|--------------|----------------------|----------------------------|-------------------|
| D6                               | During the <b>last 12 months</b> , has your cat had any of the following illnesses/injuries/conditions which you felt were not serious enough to seek veterinary attention for? |              |                      |                            |                   |
|                                  | <b>Tick one box per row</b>                                                                                                                                                     |              |                      |                            |                   |
|                                  |                                                                                                                                                                                 | Yes          | No                   | Not sure                   |                   |
|                                  | Fleas                                                                                                                                                                           |              |                      |                            |                   |
|                                  | Worms                                                                                                                                                                           |              |                      |                            |                   |
|                                  | Abscess / cat bite                                                                                                                                                              |              |                      |                            |                   |
|                                  | Attacked by dog                                                                                                                                                                 |              |                      |                            |                   |
|                                  | Cat flu                                                                                                                                                                         |              |                      |                            |                   |
|                                  | Coughing / wheezing                                                                                                                                                             |              |                      |                            |                   |
|                                  | Scratching his/her ears and/or shaking his/her head                                                                                                                             |              |                      |                            |                   |
|                                  | Urinary problem (e.g. cystitis, blocked bladder)                                                                                                                                |              |                      |                            |                   |
|                                  | Skin problem (e.g. itchy, excessive grooming, hair loss)                                                                                                                        |              |                      |                            |                   |
|                                  | Eye problem (e.g. conjunctivitis)                                                                                                                                               |              |                      |                            |                   |
|                                  | Dental / tooth / mouth problem                                                                                                                                                  |              |                      |                            |                   |
|                                  | Lameness / limb problem                                                                                                                                                         |              |                      |                            |                   |
|                                  | Heart problem (e.g. previously detected murmur)                                                                                                                                 |              |                      |                            |                   |
|                                  | Vomiting/sickness                                                                                                                                                               |              |                      |                            |                   |
|                                  | Diarrhoea                                                                                                                                                                       |              |                      |                            |                   |
|                                  | Cat 'off colour'                                                                                                                                                                |              |                      |                            |                   |
|                                  | Reduced appetite                                                                                                                                                                |              |                      |                            |                   |
| Increased appetite               |                                                                                                                                                                                 |              |                      |                            |                   |
| Increased thirst                 |                                                                                                                                                                                 |              |                      |                            |                   |
| Weight loss                      |                                                                                                                                                                                 |              |                      |                            |                   |
| Other ( <i>please specify</i> ): |                                                                                                                                                                                 |              |                      |                            |                   |
| D7                               | Please use this space to provide further details of problems that your cat has had but which have not led to veterinary attention, as indicated above.                          |              |                      |                            |                   |
| D8                               | During the <b>last 12 months</b> , have you seen any worms, fleas / flea dirt or signs suggestive of worms or fleas (e.g. scratching, worms in vomit or faeces)?                |              |                      |                            |                   |
|                                  | <b>Tick one box per row</b>                                                                                                                                                     |              |                      |                            |                   |
|                                  |                                                                                                                                                                                 | Yes          | No                   | Not sure                   |                   |
| Evidence of worms                |                                                                                                                                                                                 |              |                      |                            |                   |
| Evidence of fleas                |                                                                                                                                                                                 |              |                      |                            |                   |
| D9                               | How many times, if at all, have you wormed or used flea treatment/prevention on your cat during the last 12 months?                                                             |              |                      |                            |                   |
|                                  | <b>Tick one box per row</b>                                                                                                                                                     |              |                      |                            |                   |
|                                  |                                                                                                                                                                                 | <i>Never</i> | <i>Once or twice</i> | <i>Three or more times</i> | <i>Don't know</i> |
|                                  | Wormer                                                                                                                                                                          |              |                      |                            |                   |
| Flea treatment                   |                                                                                                                                                                                 |              |                      |                            |                   |

|     |                                                                                                                                                                              |                        |                     |                 |                               |           |                 |
|-----|------------------------------------------------------------------------------------------------------------------------------------------------------------------------------|------------------------|---------------------|-----------------|-------------------------------|-----------|-----------------|
| D10 | Is your cat insured?                                                                                                                                                         | <b>Tick one box</b>    |                     |                 |                               |           |                 |
|     |                                                                                                                                                                              | Yes                    | No                  |                 |                               |           |                 |
|     | Insured                                                                                                                                                                      |                        |                     |                 |                               |           |                 |
| D11 | Please indicate the date of your cat's last vaccination. <i>(If not sure, please enter approximate month and year in space below):</i>                                       |                        |                     |                 |                               |           |                 |
|     | Date of last vaccination...../...../.....                                                                                                                                    |                        |                     |                 |                               |           |                 |
|     | Or, approximate date:.....(month) .....(year)                                                                                                                                |                        |                     |                 |                               |           |                 |
|     | <input type="checkbox"/> Not applicable: never been vaccinated ( <b>go to D15</b> )                                                                                          |                        |                     |                 |                               |           |                 |
| D12 | Was your cat vaccinated at the practice that was your 'usual' veterinary practice at that time?                                                                              |                        | <b>Tick one box</b> |                 |                               |           |                 |
|     | Yes – usual veterinary practice (please also tick if you are a vet and usually vaccinate your own cat)                                                                       |                        |                     |                 |                               |           |                 |
|     | No – I went to a different practice on this occasion                                                                                                                         |                        |                     |                 |                               |           |                 |
| D13 | Are the details of your cat's most recent vaccination recorded on his/her vaccination card?                                                                                  |                        |                     |                 |                               |           |                 |
|     | <b>Tick one box</b>                                                                                                                                                          |                        |                     |                 |                               |           |                 |
|     | Yes                                                                                                                                                                          |                        |                     |                 |                               |           |                 |
|     | No                                                                                                                                                                           |                        |                     |                 |                               |           |                 |
|     | Can't remember                                                                                                                                                               |                        |                     |                 |                               |           |                 |
| D14 | At the last vaccination, which of the following diseases did your vet recommend your cat was vaccinated against and which diseases was your cat actually vaccinated against? |                        |                     |                 |                               |           |                 |
|     | <b>Tick all that apply</b>                                                                                                                                                   |                        |                     |                 |                               |           |                 |
|     |                                                                                                                                                                              | <b>Vet recommended</b> |                     |                 | <b>Cat vaccinated against</b> |           |                 |
|     | <b>Disease</b>                                                                                                                                                               | <b>Yes</b>             | <b>No</b>           | <b>Not sure</b> | <b>Yes</b>                    | <b>No</b> | <b>Not sure</b> |
|     | Bordetella                                                                                                                                                                   |                        |                     |                 |                               |           |                 |
|     | Cat flu (Feline Herpes Virus (FHV-1) / Feline Calicivirus (FCV))                                                                                                             |                        |                     |                 |                               |           |                 |
|     | Feline Infectious Enteritis (FIE) or Panleucopenia                                                                                                                           |                        |                     |                 |                               |           |                 |
|     | Feline Leukaemia Virus (FeLV)                                                                                                                                                |                        |                     |                 |                               |           |                 |
|     | Feline Chlamydia                                                                                                                                                             |                        |                     |                 |                               |           |                 |
|     | Rabies                                                                                                                                                                       |                        |                     |                 |                               |           |                 |

|     |                                                                                                                                                                                                     |                  |                           |                    |                        |                             |  |  |  |  |
|-----|-----------------------------------------------------------------------------------------------------------------------------------------------------------------------------------------------------|------------------|---------------------------|--------------------|------------------------|-----------------------------|--|--|--|--|
| D15 | Excluding emergency/out of hours appointments, do you use different veterinary practices for different problems/treatments for this cat, or do you use the same veterinary practice for everything? |                  |                           |                    |                        | <b>Tick one box</b>         |  |  |  |  |
|     | Same practice for everything                                                                                                                                                                        |                  |                           |                    |                        |                             |  |  |  |  |
|     | Different practices for different problems/illnesses/treatments                                                                                                                                     |                  |                           |                    |                        |                             |  |  |  |  |
|     | Prefer not to answer this question                                                                                                                                                                  |                  |                           |                    |                        |                             |  |  |  |  |
|     | Other ( <i>please specify</i> ):                                                                                                                                                                    |                  |                           |                    |                        |                             |  |  |  |  |
| D16 | Is your 'Bristol cat' neutered (desexed)?                                                                                                                                                           |                  |                           |                    |                        | <b>Tick one box</b>         |  |  |  |  |
|     | Yes – at or before 5 years of age                                                                                                                                                                   |                  |                           |                    |                        |                             |  |  |  |  |
|     | Yes – since 5 years of age                                                                                                                                                                          |                  |                           |                    |                        |                             |  |  |  |  |
|     | No                                                                                                                                                                                                  |                  |                           |                    |                        |                             |  |  |  |  |
| D17 | How frequently, if at all, do you do the following to help keep your cat's teeth and mouth healthy?                                                                                                 |                  |                           |                    |                        | <b>Tick one box per row</b> |  |  |  |  |
|     |                                                                                                                                                                                                     | <i>Every day</i> | <i>A few times a week</i> | <i>Once a week</i> | <i>Less frequently</i> | <i>Never</i>                |  |  |  |  |
|     | Brush teeth                                                                                                                                                                                         |                  |                           |                    |                        |                             |  |  |  |  |
|     | Use dental gel or mouth rinse                                                                                                                                                                       |                  |                           |                    |                        |                             |  |  |  |  |
|     | Use food or water additive                                                                                                                                                                          |                  |                           |                    |                        |                             |  |  |  |  |
|     | Feed dental treats                                                                                                                                                                                  |                  |                           |                    |                        |                             |  |  |  |  |
|     | Feed a special dental health diet                                                                                                                                                                   |                  |                           |                    |                        |                             |  |  |  |  |
|     | Feed home-prepared fresh food                                                                                                                                                                       |                  |                           |                    |                        |                             |  |  |  |  |
|     | Other ( <i>please specify</i> ):                                                                                                                                                                    |                  |                           |                    |                        |                             |  |  |  |  |
| D18 | If you use any 'dental health' products mentioned in the question above, please name the product(s) used:                                                                                           |                  |                           |                    |                        |                             |  |  |  |  |

|                                            |                                                                                                                                                         |                          |                                                  |                     |           |
|--------------------------------------------|---------------------------------------------------------------------------------------------------------------------------------------------------------|--------------------------|--------------------------------------------------|---------------------|-----------|
| D19                                        | During the last 12 months, has a vet/vet nurse commented on the health of your cat's teeth and mouth?                                                   |                          | <b>Please tick the comment that applies best</b> |                     |           |
|                                            | Yes – advised that teeth and mouth are in good health                                                                                                   |                          |                                                  |                     |           |
|                                            | Yes – advised that cat has some dental/oral disease and that dental treatment (under anaesthetic) may be necessary in the future                        |                          |                                                  |                     |           |
|                                            | Yes – advised that that cat has a 'scale and polish' (under anaesthetic)                                                                                |                          |                                                  |                     |           |
|                                            | Yes – advised that cat has dental/oral disease and recommended that dental treatment under anaesthetic (excluding a 'scale and polish only') was needed |                          |                                                  |                     |           |
|                                            | No – no comment on teeth/mouth made                                                                                                                     |                          |                                                  |                     |           |
|                                            | N/A – has not seen a vet or vet nurse in the past 12 months                                                                                             |                          |                                                  |                     |           |
| D20                                        | Has your cat had any dental work carried out during the last 12 months by the vet?                                                                      |                          |                                                  |                     |           |
|                                            | <b>Tick one box</b>                                                                                                                                     |                          |                                                  |                     |           |
|                                            | Yes                                                                                                                                                     |                          |                                                  |                     |           |
|                                            | No                                                                                                                                                      |                          |                                                  |                     |           |
| <b>If 'no', please go to question D22.</b> |                                                                                                                                                         |                          |                                                  |                     |           |
| D21                                        | If your cat has had dental work carried out during the last 12 months, please provide further information below regarding the work carried out:         |                          |                                                  | <b>Tick one box</b> |           |
|                                            | Scale and polish only                                                                                                                                   |                          |                                                  |                     |           |
|                                            | A few teeth extracted (e.g. 1 or 2)                                                                                                                     |                          |                                                  |                     |           |
|                                            | A moderate number of teeth extracted (e.g. 3-6)                                                                                                         |                          |                                                  |                     |           |
|                                            | A lot of teeth extracted (e.g. 7 or more)                                                                                                               |                          |                                                  |                     |           |
|                                            | Other (please specify, including reasons for extractions, if known:)                                                                                    |                          |                                                  |                     |           |
| D22                                        | During the last 12 months, have you seen your cat drinking, urinating or defecating?                                                                    |                          |                                                  |                     |           |
|                                            | <b>Tick one box for each row</b>                                                                                                                        |                          |                                                  |                     |           |
|                                            |                                                                                                                                                         | Yes                      | No                                               |                     |           |
|                                            | Drinking                                                                                                                                                |                          |                                                  |                     |           |
|                                            | Urinating                                                                                                                                               |                          |                                                  |                     |           |
|                                            | Defecating                                                                                                                                              |                          |                                                  |                     |           |
| D23                                        | Please indicate whether you are aware of any changes in your cat in the areas of drinking and urination, during the last 12 months.                     |                          |                                                  |                     |           |
|                                            | <b>Tick one box for each row</b>                                                                                                                        |                          |                                                  |                     |           |
|                                            |                                                                                                                                                         | Not aware of any changes | No change                                        | Increased           | Decreased |
|                                            | Amount of water that cat drinks                                                                                                                         |                          |                                                  |                     |           |
|                                            | Amount of urine that cat passes                                                                                                                         |                          |                                                  |                     |           |

|                                                                                    |                                                                                                                                             |  |                            |                                  |    |                                        |
|------------------------------------------------------------------------------------|---------------------------------------------------------------------------------------------------------------------------------------------|--|----------------------------|----------------------------------|----|----------------------------------------|
| D24                                                                                | If you think that your cat has been drinking more, or less, water during the last 12 months, please indicate the reason(s) for your answer. |  | <b>Tick all that apply</b> |                                  |    |                                        |
|                                                                                    | Water bowl needs refilling more/less frequently                                                                                             |  |                            |                                  |    |                                        |
|                                                                                    | I see the cat drinking inside more/less often                                                                                               |  |                            |                                  |    |                                        |
|                                                                                    | I see the cat drinking outside more/less often                                                                                              |  |                            |                                  |    |                                        |
|                                                                                    | Other ( <i>please specify</i> )                                                                                                             |  |                            |                                  |    |                                        |
| D25                                                                                | Which, if any, of the following have you been aware of whilst watching your cat urinating?                                                  |  |                            | <b>Tick one box for each row</b> |    |                                        |
|                                                                                    |                                                                                                                                             |  |                            | Yes                              | No | <i>N/A have not seen cat urinating</i> |
|                                                                                    | He/she strains or appears to have difficulty urinating                                                                                      |  |                            |                                  |    |                                        |
|                                                                                    | He/she has passed blood when urinating                                                                                                      |  |                            |                                  |    |                                        |
|                                                                                    | He/she vocalises (e.g. miaows) before or during urination                                                                                   |  |                            |                                  |    |                                        |
| He/she sometimes urinates in different locations (around the house and/or outside) |                                                                                                                                             |  |                            |                                  |    |                                        |

D26 Using the diagrams below, please indicate how frequently during the last week, if at all, has your cat been grooming, scratching, biting, licking, chewing, nibbling, rubbing (out of discomfort rather than 'normal rubbing or grooming behaviour') him/herself in any area within each of these marked regions.

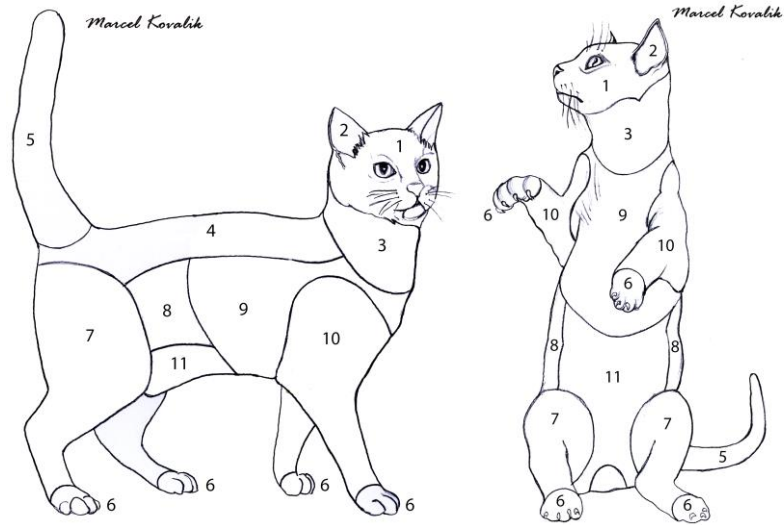

**Tick one box for each row**

|                                               | Almost continuously | A lot of the time and/or for long spells of time (including when eating, playing or being distracted) | A moderate amount of time (but not when eating, playing or being distracted) | Only occasionally (and out of discomfort rather than 'normal rubbing or grooming behaviour') | Not at all (out of discomfort rather than 'normal rubbing or grooming behaviour') |
|-----------------------------------------------|---------------------|-------------------------------------------------------------------------------------------------------|------------------------------------------------------------------------------|----------------------------------------------------------------------------------------------|-----------------------------------------------------------------------------------|
| 1 (head)                                      |                     |                                                                                                       |                                                                              |                                                                                              |                                                                                   |
| 2 (ears)                                      |                     |                                                                                                       |                                                                              |                                                                                              |                                                                                   |
| 3 (neck)                                      |                     |                                                                                                       |                                                                              |                                                                                              |                                                                                   |
| 4 (back and base of tail)                     |                     |                                                                                                       |                                                                              |                                                                                              |                                                                                   |
| 5 (tail)                                      |                     |                                                                                                       |                                                                              |                                                                                              |                                                                                   |
| 6 (paws)                                      |                     |                                                                                                       |                                                                              |                                                                                              |                                                                                   |
| 7 (back legs and thigh, excluding paws)       |                     |                                                                                                       |                                                                              |                                                                                              |                                                                                   |
| 8 (flank)                                     |                     |                                                                                                       |                                                                              |                                                                                              |                                                                                   |
| 9 (chest and sides)                           |                     |                                                                                                       |                                                                              |                                                                                              |                                                                                   |
| 10 (front legs and shoulders, excluding paws) |                     |                                                                                                       |                                                                              |                                                                                              |                                                                                   |
| 11 (tummy)                                    |                     |                                                                                                       |                                                                              |                                                                                              |                                                                                   |

D27 Using the same two diagrams, please indicate which of the following list, if any, you have noticed on your cat:

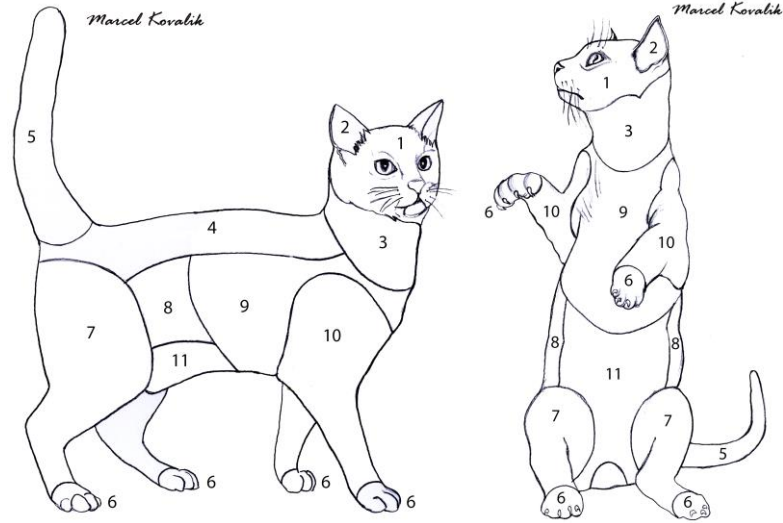

**Tick all that apply one box**

|                                               | Bald patches / clumps of hair missing / falling out | General thinning of the coat (including short barbered hair but excluding usual moulting) | Scabs / crusts | Lumps / bumps / swellings | Redness of the skin | Bleeding | None of these - hair and skin appear normal |
|-----------------------------------------------|-----------------------------------------------------|-------------------------------------------------------------------------------------------|----------------|---------------------------|---------------------|----------|---------------------------------------------|
| 1 (head)                                      |                                                     |                                                                                           |                |                           |                     |          |                                             |
| 2 (ears)                                      |                                                     |                                                                                           |                |                           |                     |          |                                             |
| 3 (neck)                                      |                                                     |                                                                                           |                |                           |                     |          |                                             |
| 4 (back and base of tail)                     |                                                     |                                                                                           |                |                           |                     |          |                                             |
| 5 (tail)                                      |                                                     |                                                                                           |                |                           |                     |          |                                             |
| 6 (paws)                                      |                                                     |                                                                                           |                |                           |                     |          |                                             |
| 7 (back legs and thigh, excluding paws)       |                                                     |                                                                                           |                |                           |                     |          |                                             |
| 8 (flank)                                     |                                                     |                                                                                           |                |                           |                     |          |                                             |
| 9 (chest and sides)                           |                                                     |                                                                                           |                |                           |                     |          |                                             |
| 10 (front legs and shoulders, excluding paws) |                                                     |                                                                                           |                |                           |                     |          |                                             |
| 11 (tummy)                                    |                                                     |                                                                                           |                |                           |                     |          |                                             |



## SECTION E: What is normal for your cat at the moment?

| E1                                                                             | During a 'typical' week, which of these phrases best describes the <b><i>usual</i></b> consistency of your cat's faeces?                                                                                                                                                                                                                                                                                                                                                                                                                                                                                                                                                                                                                                                                                                                                                                                                                                                                                                                                                                                                                                                                                                                                                                                                                                                                                                                                                                                                                                                                                                                                                                                                                                                                                                                                                                                                                                                                                                                                                                                                                                                                                                                                                                                                                                                                                         |                      |            |          |            |          |            |            |  |              |  |                                                                  |  |  |  |  |                                              |  |  |  |  |                                     |  |  |  |  |                                             |  |  |  |  |                                    |  |  |  |  |                                                  |  |  |  |  |                                        |  |  |  |  |                      |  |  |  |  |                                       |  |  |  |  |                                                         |  |  |  |  |                                                                     |  |  |  |  |                                                                                |  |  |  |  |                                                                 |  |  |  |  |                                         |  |  |  |  |                                    |  |  |  |  |
|--------------------------------------------------------------------------------|------------------------------------------------------------------------------------------------------------------------------------------------------------------------------------------------------------------------------------------------------------------------------------------------------------------------------------------------------------------------------------------------------------------------------------------------------------------------------------------------------------------------------------------------------------------------------------------------------------------------------------------------------------------------------------------------------------------------------------------------------------------------------------------------------------------------------------------------------------------------------------------------------------------------------------------------------------------------------------------------------------------------------------------------------------------------------------------------------------------------------------------------------------------------------------------------------------------------------------------------------------------------------------------------------------------------------------------------------------------------------------------------------------------------------------------------------------------------------------------------------------------------------------------------------------------------------------------------------------------------------------------------------------------------------------------------------------------------------------------------------------------------------------------------------------------------------------------------------------------------------------------------------------------------------------------------------------------------------------------------------------------------------------------------------------------------------------------------------------------------------------------------------------------------------------------------------------------------------------------------------------------------------------------------------------------------------------------------------------------------------------------------------------------|----------------------|------------|----------|------------|----------|------------|------------|--|--------------|--|------------------------------------------------------------------|--|--|--|--|----------------------------------------------|--|--|--|--|-------------------------------------|--|--|--|--|---------------------------------------------|--|--|--|--|------------------------------------|--|--|--|--|--------------------------------------------------|--|--|--|--|----------------------------------------|--|--|--|--|----------------------|--|--|--|--|---------------------------------------|--|--|--|--|---------------------------------------------------------|--|--|--|--|---------------------------------------------------------------------|--|--|--|--|--------------------------------------------------------------------------------|--|--|--|--|-----------------------------------------------------------------|--|--|--|--|-----------------------------------------|--|--|--|--|------------------------------------|--|--|--|--|
|                                                                                | <b><i>Tick one box</i></b>                                                                                                                                                                                                                                                                                                                                                                                                                                                                                                                                                                                                                                                                                                                                                                                                                                                                                                                                                                                                                                                                                                                                                                                                                                                                                                                                                                                                                                                                                                                                                                                                                                                                                                                                                                                                                                                                                                                                                                                                                                                                                                                                                                                                                                                                                                                                                                                       |                      |            |          |            |          |            |            |  |              |  |                                                                  |  |  |  |  |                                              |  |  |  |  |                                     |  |  |  |  |                                             |  |  |  |  |                                    |  |  |  |  |                                                  |  |  |  |  |                                        |  |  |  |  |                      |  |  |  |  |                                       |  |  |  |  |                                                         |  |  |  |  |                                                                     |  |  |  |  |                                                                                |  |  |  |  |                                                                 |  |  |  |  |                                         |  |  |  |  |                                    |  |  |  |  |
|                                                                                | <table border="1" style="width: 100%; border-collapse: collapse;"> <tr> <td style="padding: 5px;">Have not seen faeces</td> <td style="width: 50px;"></td> </tr> <tr> <td style="padding: 5px;">Dry/hard</td> <td></td> </tr> <tr> <td style="padding: 5px;">Firm</td> <td></td> </tr> <tr> <td style="padding: 5px;">Soft/loose</td> <td></td> </tr> <tr> <td style="padding: 5px;">Runny/watery</td> <td></td> </tr> <tr> <td style="padding: 5px;">Varies</td> <td></td> </tr> </table>                                                                                                                                                                                                                                                                                                                                                                                                                                                                                                                                                                                                                                                                                                                                                                                                                                                                                                                                                                                                                                                                                                                                                                                                                                                                                                                                                                                                                                                                                                                                                                                                                                                                                                                                                                                                                                                                                                                       | Have not seen faeces |            | Dry/hard |            | Firm     |            | Soft/loose |  | Runny/watery |  | Varies                                                           |  |  |  |  |                                              |  |  |  |  |                                     |  |  |  |  |                                             |  |  |  |  |                                    |  |  |  |  |                                                  |  |  |  |  |                                        |  |  |  |  |                      |  |  |  |  |                                       |  |  |  |  |                                                         |  |  |  |  |                                                                     |  |  |  |  |                                                                                |  |  |  |  |                                                                 |  |  |  |  |                                         |  |  |  |  |                                    |  |  |  |  |
| Have not seen faeces                                                           |                                                                                                                                                                                                                                                                                                                                                                                                                                                                                                                                                                                                                                                                                                                                                                                                                                                                                                                                                                                                                                                                                                                                                                                                                                                                                                                                                                                                                                                                                                                                                                                                                                                                                                                                                                                                                                                                                                                                                                                                                                                                                                                                                                                                                                                                                                                                                                                                                  |                      |            |          |            |          |            |            |  |              |  |                                                                  |  |  |  |  |                                              |  |  |  |  |                                     |  |  |  |  |                                             |  |  |  |  |                                    |  |  |  |  |                                                  |  |  |  |  |                                        |  |  |  |  |                      |  |  |  |  |                                       |  |  |  |  |                                                         |  |  |  |  |                                                                     |  |  |  |  |                                                                                |  |  |  |  |                                                                 |  |  |  |  |                                         |  |  |  |  |                                    |  |  |  |  |
| Dry/hard                                                                       |                                                                                                                                                                                                                                                                                                                                                                                                                                                                                                                                                                                                                                                                                                                                                                                                                                                                                                                                                                                                                                                                                                                                                                                                                                                                                                                                                                                                                                                                                                                                                                                                                                                                                                                                                                                                                                                                                                                                                                                                                                                                                                                                                                                                                                                                                                                                                                                                                  |                      |            |          |            |          |            |            |  |              |  |                                                                  |  |  |  |  |                                              |  |  |  |  |                                     |  |  |  |  |                                             |  |  |  |  |                                    |  |  |  |  |                                                  |  |  |  |  |                                        |  |  |  |  |                      |  |  |  |  |                                       |  |  |  |  |                                                         |  |  |  |  |                                                                     |  |  |  |  |                                                                                |  |  |  |  |                                                                 |  |  |  |  |                                         |  |  |  |  |                                    |  |  |  |  |
| Firm                                                                           |                                                                                                                                                                                                                                                                                                                                                                                                                                                                                                                                                                                                                                                                                                                                                                                                                                                                                                                                                                                                                                                                                                                                                                                                                                                                                                                                                                                                                                                                                                                                                                                                                                                                                                                                                                                                                                                                                                                                                                                                                                                                                                                                                                                                                                                                                                                                                                                                                  |                      |            |          |            |          |            |            |  |              |  |                                                                  |  |  |  |  |                                              |  |  |  |  |                                     |  |  |  |  |                                             |  |  |  |  |                                    |  |  |  |  |                                                  |  |  |  |  |                                        |  |  |  |  |                      |  |  |  |  |                                       |  |  |  |  |                                                         |  |  |  |  |                                                                     |  |  |  |  |                                                                                |  |  |  |  |                                                                 |  |  |  |  |                                         |  |  |  |  |                                    |  |  |  |  |
| Soft/loose                                                                     |                                                                                                                                                                                                                                                                                                                                                                                                                                                                                                                                                                                                                                                                                                                                                                                                                                                                                                                                                                                                                                                                                                                                                                                                                                                                                                                                                                                                                                                                                                                                                                                                                                                                                                                                                                                                                                                                                                                                                                                                                                                                                                                                                                                                                                                                                                                                                                                                                  |                      |            |          |            |          |            |            |  |              |  |                                                                  |  |  |  |  |                                              |  |  |  |  |                                     |  |  |  |  |                                             |  |  |  |  |                                    |  |  |  |  |                                                  |  |  |  |  |                                        |  |  |  |  |                      |  |  |  |  |                                       |  |  |  |  |                                                         |  |  |  |  |                                                                     |  |  |  |  |                                                                                |  |  |  |  |                                                                 |  |  |  |  |                                         |  |  |  |  |                                    |  |  |  |  |
| Runny/watery                                                                   |                                                                                                                                                                                                                                                                                                                                                                                                                                                                                                                                                                                                                                                                                                                                                                                                                                                                                                                                                                                                                                                                                                                                                                                                                                                                                                                                                                                                                                                                                                                                                                                                                                                                                                                                                                                                                                                                                                                                                                                                                                                                                                                                                                                                                                                                                                                                                                                                                  |                      |            |          |            |          |            |            |  |              |  |                                                                  |  |  |  |  |                                              |  |  |  |  |                                     |  |  |  |  |                                             |  |  |  |  |                                    |  |  |  |  |                                                  |  |  |  |  |                                        |  |  |  |  |                      |  |  |  |  |                                       |  |  |  |  |                                                         |  |  |  |  |                                                                     |  |  |  |  |                                                                                |  |  |  |  |                                                                 |  |  |  |  |                                         |  |  |  |  |                                    |  |  |  |  |
| Varies                                                                         |                                                                                                                                                                                                                                                                                                                                                                                                                                                                                                                                                                                                                                                                                                                                                                                                                                                                                                                                                                                                                                                                                                                                                                                                                                                                                                                                                                                                                                                                                                                                                                                                                                                                                                                                                                                                                                                                                                                                                                                                                                                                                                                                                                                                                                                                                                                                                                                                                  |                      |            |          |            |          |            |            |  |              |  |                                                                  |  |  |  |  |                                              |  |  |  |  |                                     |  |  |  |  |                                             |  |  |  |  |                                    |  |  |  |  |                                                  |  |  |  |  |                                        |  |  |  |  |                      |  |  |  |  |                                       |  |  |  |  |                                                         |  |  |  |  |                                                                     |  |  |  |  |                                                                                |  |  |  |  |                                                                 |  |  |  |  |                                         |  |  |  |  |                                    |  |  |  |  |
| E2                                                                             | Please select the statement that best applies to your cat for each of these activities.                                                                                                                                                                                                                                                                                                                                                                                                                                                                                                                                                                                                                                                                                                                                                                                                                                                                                                                                                                                                                                                                                                                                                                                                                                                                                                                                                                                                                                                                                                                                                                                                                                                                                                                                                                                                                                                                                                                                                                                                                                                                                                                                                                                                                                                                                                                          |                      |            |          |            |          |            |            |  |              |  |                                                                  |  |  |  |  |                                              |  |  |  |  |                                     |  |  |  |  |                                             |  |  |  |  |                                    |  |  |  |  |                                                  |  |  |  |  |                                        |  |  |  |  |                      |  |  |  |  |                                       |  |  |  |  |                                                         |  |  |  |  |                                                                     |  |  |  |  |                                                                                |  |  |  |  |                                                                 |  |  |  |  |                                         |  |  |  |  |                                    |  |  |  |  |
|                                                                                | <b><i>Tick one box per row</i></b>                                                                                                                                                                                                                                                                                                                                                                                                                                                                                                                                                                                                                                                                                                                                                                                                                                                                                                                                                                                                                                                                                                                                                                                                                                                                                                                                                                                                                                                                                                                                                                                                                                                                                                                                                                                                                                                                                                                                                                                                                                                                                                                                                                                                                                                                                                                                                                               |                      |            |          |            |          |            |            |  |              |  |                                                                  |  |  |  |  |                                              |  |  |  |  |                                     |  |  |  |  |                                             |  |  |  |  |                                    |  |  |  |  |                                                  |  |  |  |  |                                        |  |  |  |  |                      |  |  |  |  |                                       |  |  |  |  |                                                         |  |  |  |  |                                                                     |  |  |  |  |                                                                                |  |  |  |  |                                                                 |  |  |  |  |                                         |  |  |  |  |                                    |  |  |  |  |
|                                                                                | <table border="1" style="width: 100%; border-collapse: collapse;"> <thead> <tr> <th style="width: 60%;"></th> <th style="width: 10%;">No</th> <th style="width: 10%;">Maybe</th> <th style="width: 10%;">Yes</th> <th style="width: 10%;">N/A</th> </tr> </thead> <tbody> <tr> <td style="padding: 5px;">My cat....</td> <td></td> <td></td> <td></td> <td></td> </tr> <tr> <td style="padding: 5px;">is less willing to jump up or down than he/she was 18 months ago</td> <td></td> <td></td> <td></td> <td></td> </tr> <tr> <td style="padding: 5px;">will only jump up or down from lower heights</td> <td></td> <td></td> <td></td> <td></td> </tr> <tr> <td style="padding: 5px;">shows signs of being stiff at times</td> <td></td> <td></td> <td></td> <td></td> </tr> <tr> <td style="padding: 5px;">is less agile than he/she was 18 months ago</td> <td></td> <td></td> <td></td> <td></td> </tr> <tr> <td style="padding: 5px;">shows signs of lameness or limping</td> <td></td> <td></td> <td></td> <td></td> </tr> <tr> <td style="padding: 5px;">has difficulty getting in or out of the cat flap</td> <td></td> <td></td> <td></td> <td></td> </tr> <tr> <td style="padding: 5px;">has difficulty going up or down stairs</td> <td></td> <td></td> <td></td> <td></td> </tr> <tr> <td style="padding: 5px;">cries when picked up</td> <td></td> <td></td> <td></td> <td></td> </tr> <tr> <td style="padding: 5px;">has accidents outside the litter tray</td> <td></td> <td></td> <td></td> <td></td> </tr> <tr> <td style="padding: 5px;">spends less time grooming than he/she did 18 months ago</td> <td></td> <td></td> <td></td> <td></td> </tr> <tr> <td style="padding: 5px;">is more reluctant to interact with me than he/she was 18 months ago</td> <td></td> <td></td> <td></td> <td></td> </tr> <tr> <td style="padding: 5px;">plays less (e.g. with other animals and/or toys) than he/she did 18 months ago</td> <td></td> <td></td> <td></td> <td></td> </tr> <tr> <td style="padding: 5px;">sleeps more and/or is less active than he/she did 18 months ago</td> <td></td> <td></td> <td></td> <td></td> </tr> <tr> <td style="padding: 5px;">cries out loudly for no apparent reason</td> <td></td> <td></td> <td></td> <td></td> </tr> <tr> <td style="padding: 5px;">appears forgetful or disorientated</td> <td></td> <td></td> <td></td> <td></td> </tr> </tbody> </table> |                      | No         | Maybe    | Yes        | N/A      | My cat.... |            |  |              |  | is less willing to jump up or down than he/she was 18 months ago |  |  |  |  | will only jump up or down from lower heights |  |  |  |  | shows signs of being stiff at times |  |  |  |  | is less agile than he/she was 18 months ago |  |  |  |  | shows signs of lameness or limping |  |  |  |  | has difficulty getting in or out of the cat flap |  |  |  |  | has difficulty going up or down stairs |  |  |  |  | cries when picked up |  |  |  |  | has accidents outside the litter tray |  |  |  |  | spends less time grooming than he/she did 18 months ago |  |  |  |  | is more reluctant to interact with me than he/she was 18 months ago |  |  |  |  | plays less (e.g. with other animals and/or toys) than he/she did 18 months ago |  |  |  |  | sleeps more and/or is less active than he/she did 18 months ago |  |  |  |  | cries out loudly for no apparent reason |  |  |  |  | appears forgetful or disorientated |  |  |  |  |
|                                                                                | No                                                                                                                                                                                                                                                                                                                                                                                                                                                                                                                                                                                                                                                                                                                                                                                                                                                                                                                                                                                                                                                                                                                                                                                                                                                                                                                                                                                                                                                                                                                                                                                                                                                                                                                                                                                                                                                                                                                                                                                                                                                                                                                                                                                                                                                                                                                                                                                                               | Maybe                | Yes        | N/A      |            |          |            |            |  |              |  |                                                                  |  |  |  |  |                                              |  |  |  |  |                                     |  |  |  |  |                                             |  |  |  |  |                                    |  |  |  |  |                                                  |  |  |  |  |                                        |  |  |  |  |                      |  |  |  |  |                                       |  |  |  |  |                                                         |  |  |  |  |                                                                     |  |  |  |  |                                                                                |  |  |  |  |                                                                 |  |  |  |  |                                         |  |  |  |  |                                    |  |  |  |  |
| My cat....                                                                     |                                                                                                                                                                                                                                                                                                                                                                                                                                                                                                                                                                                                                                                                                                                                                                                                                                                                                                                                                                                                                                                                                                                                                                                                                                                                                                                                                                                                                                                                                                                                                                                                                                                                                                                                                                                                                                                                                                                                                                                                                                                                                                                                                                                                                                                                                                                                                                                                                  |                      |            |          |            |          |            |            |  |              |  |                                                                  |  |  |  |  |                                              |  |  |  |  |                                     |  |  |  |  |                                             |  |  |  |  |                                    |  |  |  |  |                                                  |  |  |  |  |                                        |  |  |  |  |                      |  |  |  |  |                                       |  |  |  |  |                                                         |  |  |  |  |                                                                     |  |  |  |  |                                                                                |  |  |  |  |                                                                 |  |  |  |  |                                         |  |  |  |  |                                    |  |  |  |  |
| is less willing to jump up or down than he/she was 18 months ago               |                                                                                                                                                                                                                                                                                                                                                                                                                                                                                                                                                                                                                                                                                                                                                                                                                                                                                                                                                                                                                                                                                                                                                                                                                                                                                                                                                                                                                                                                                                                                                                                                                                                                                                                                                                                                                                                                                                                                                                                                                                                                                                                                                                                                                                                                                                                                                                                                                  |                      |            |          |            |          |            |            |  |              |  |                                                                  |  |  |  |  |                                              |  |  |  |  |                                     |  |  |  |  |                                             |  |  |  |  |                                    |  |  |  |  |                                                  |  |  |  |  |                                        |  |  |  |  |                      |  |  |  |  |                                       |  |  |  |  |                                                         |  |  |  |  |                                                                     |  |  |  |  |                                                                                |  |  |  |  |                                                                 |  |  |  |  |                                         |  |  |  |  |                                    |  |  |  |  |
| will only jump up or down from lower heights                                   |                                                                                                                                                                                                                                                                                                                                                                                                                                                                                                                                                                                                                                                                                                                                                                                                                                                                                                                                                                                                                                                                                                                                                                                                                                                                                                                                                                                                                                                                                                                                                                                                                                                                                                                                                                                                                                                                                                                                                                                                                                                                                                                                                                                                                                                                                                                                                                                                                  |                      |            |          |            |          |            |            |  |              |  |                                                                  |  |  |  |  |                                              |  |  |  |  |                                     |  |  |  |  |                                             |  |  |  |  |                                    |  |  |  |  |                                                  |  |  |  |  |                                        |  |  |  |  |                      |  |  |  |  |                                       |  |  |  |  |                                                         |  |  |  |  |                                                                     |  |  |  |  |                                                                                |  |  |  |  |                                                                 |  |  |  |  |                                         |  |  |  |  |                                    |  |  |  |  |
| shows signs of being stiff at times                                            |                                                                                                                                                                                                                                                                                                                                                                                                                                                                                                                                                                                                                                                                                                                                                                                                                                                                                                                                                                                                                                                                                                                                                                                                                                                                                                                                                                                                                                                                                                                                                                                                                                                                                                                                                                                                                                                                                                                                                                                                                                                                                                                                                                                                                                                                                                                                                                                                                  |                      |            |          |            |          |            |            |  |              |  |                                                                  |  |  |  |  |                                              |  |  |  |  |                                     |  |  |  |  |                                             |  |  |  |  |                                    |  |  |  |  |                                                  |  |  |  |  |                                        |  |  |  |  |                      |  |  |  |  |                                       |  |  |  |  |                                                         |  |  |  |  |                                                                     |  |  |  |  |                                                                                |  |  |  |  |                                                                 |  |  |  |  |                                         |  |  |  |  |                                    |  |  |  |  |
| is less agile than he/she was 18 months ago                                    |                                                                                                                                                                                                                                                                                                                                                                                                                                                                                                                                                                                                                                                                                                                                                                                                                                                                                                                                                                                                                                                                                                                                                                                                                                                                                                                                                                                                                                                                                                                                                                                                                                                                                                                                                                                                                                                                                                                                                                                                                                                                                                                                                                                                                                                                                                                                                                                                                  |                      |            |          |            |          |            |            |  |              |  |                                                                  |  |  |  |  |                                              |  |  |  |  |                                     |  |  |  |  |                                             |  |  |  |  |                                    |  |  |  |  |                                                  |  |  |  |  |                                        |  |  |  |  |                      |  |  |  |  |                                       |  |  |  |  |                                                         |  |  |  |  |                                                                     |  |  |  |  |                                                                                |  |  |  |  |                                                                 |  |  |  |  |                                         |  |  |  |  |                                    |  |  |  |  |
| shows signs of lameness or limping                                             |                                                                                                                                                                                                                                                                                                                                                                                                                                                                                                                                                                                                                                                                                                                                                                                                                                                                                                                                                                                                                                                                                                                                                                                                                                                                                                                                                                                                                                                                                                                                                                                                                                                                                                                                                                                                                                                                                                                                                                                                                                                                                                                                                                                                                                                                                                                                                                                                                  |                      |            |          |            |          |            |            |  |              |  |                                                                  |  |  |  |  |                                              |  |  |  |  |                                     |  |  |  |  |                                             |  |  |  |  |                                    |  |  |  |  |                                                  |  |  |  |  |                                        |  |  |  |  |                      |  |  |  |  |                                       |  |  |  |  |                                                         |  |  |  |  |                                                                     |  |  |  |  |                                                                                |  |  |  |  |                                                                 |  |  |  |  |                                         |  |  |  |  |                                    |  |  |  |  |
| has difficulty getting in or out of the cat flap                               |                                                                                                                                                                                                                                                                                                                                                                                                                                                                                                                                                                                                                                                                                                                                                                                                                                                                                                                                                                                                                                                                                                                                                                                                                                                                                                                                                                                                                                                                                                                                                                                                                                                                                                                                                                                                                                                                                                                                                                                                                                                                                                                                                                                                                                                                                                                                                                                                                  |                      |            |          |            |          |            |            |  |              |  |                                                                  |  |  |  |  |                                              |  |  |  |  |                                     |  |  |  |  |                                             |  |  |  |  |                                    |  |  |  |  |                                                  |  |  |  |  |                                        |  |  |  |  |                      |  |  |  |  |                                       |  |  |  |  |                                                         |  |  |  |  |                                                                     |  |  |  |  |                                                                                |  |  |  |  |                                                                 |  |  |  |  |                                         |  |  |  |  |                                    |  |  |  |  |
| has difficulty going up or down stairs                                         |                                                                                                                                                                                                                                                                                                                                                                                                                                                                                                                                                                                                                                                                                                                                                                                                                                                                                                                                                                                                                                                                                                                                                                                                                                                                                                                                                                                                                                                                                                                                                                                                                                                                                                                                                                                                                                                                                                                                                                                                                                                                                                                                                                                                                                                                                                                                                                                                                  |                      |            |          |            |          |            |            |  |              |  |                                                                  |  |  |  |  |                                              |  |  |  |  |                                     |  |  |  |  |                                             |  |  |  |  |                                    |  |  |  |  |                                                  |  |  |  |  |                                        |  |  |  |  |                      |  |  |  |  |                                       |  |  |  |  |                                                         |  |  |  |  |                                                                     |  |  |  |  |                                                                                |  |  |  |  |                                                                 |  |  |  |  |                                         |  |  |  |  |                                    |  |  |  |  |
| cries when picked up                                                           |                                                                                                                                                                                                                                                                                                                                                                                                                                                                                                                                                                                                                                                                                                                                                                                                                                                                                                                                                                                                                                                                                                                                                                                                                                                                                                                                                                                                                                                                                                                                                                                                                                                                                                                                                                                                                                                                                                                                                                                                                                                                                                                                                                                                                                                                                                                                                                                                                  |                      |            |          |            |          |            |            |  |              |  |                                                                  |  |  |  |  |                                              |  |  |  |  |                                     |  |  |  |  |                                             |  |  |  |  |                                    |  |  |  |  |                                                  |  |  |  |  |                                        |  |  |  |  |                      |  |  |  |  |                                       |  |  |  |  |                                                         |  |  |  |  |                                                                     |  |  |  |  |                                                                                |  |  |  |  |                                                                 |  |  |  |  |                                         |  |  |  |  |                                    |  |  |  |  |
| has accidents outside the litter tray                                          |                                                                                                                                                                                                                                                                                                                                                                                                                                                                                                                                                                                                                                                                                                                                                                                                                                                                                                                                                                                                                                                                                                                                                                                                                                                                                                                                                                                                                                                                                                                                                                                                                                                                                                                                                                                                                                                                                                                                                                                                                                                                                                                                                                                                                                                                                                                                                                                                                  |                      |            |          |            |          |            |            |  |              |  |                                                                  |  |  |  |  |                                              |  |  |  |  |                                     |  |  |  |  |                                             |  |  |  |  |                                    |  |  |  |  |                                                  |  |  |  |  |                                        |  |  |  |  |                      |  |  |  |  |                                       |  |  |  |  |                                                         |  |  |  |  |                                                                     |  |  |  |  |                                                                                |  |  |  |  |                                                                 |  |  |  |  |                                         |  |  |  |  |                                    |  |  |  |  |
| spends less time grooming than he/she did 18 months ago                        |                                                                                                                                                                                                                                                                                                                                                                                                                                                                                                                                                                                                                                                                                                                                                                                                                                                                                                                                                                                                                                                                                                                                                                                                                                                                                                                                                                                                                                                                                                                                                                                                                                                                                                                                                                                                                                                                                                                                                                                                                                                                                                                                                                                                                                                                                                                                                                                                                  |                      |            |          |            |          |            |            |  |              |  |                                                                  |  |  |  |  |                                              |  |  |  |  |                                     |  |  |  |  |                                             |  |  |  |  |                                    |  |  |  |  |                                                  |  |  |  |  |                                        |  |  |  |  |                      |  |  |  |  |                                       |  |  |  |  |                                                         |  |  |  |  |                                                                     |  |  |  |  |                                                                                |  |  |  |  |                                                                 |  |  |  |  |                                         |  |  |  |  |                                    |  |  |  |  |
| is more reluctant to interact with me than he/she was 18 months ago            |                                                                                                                                                                                                                                                                                                                                                                                                                                                                                                                                                                                                                                                                                                                                                                                                                                                                                                                                                                                                                                                                                                                                                                                                                                                                                                                                                                                                                                                                                                                                                                                                                                                                                                                                                                                                                                                                                                                                                                                                                                                                                                                                                                                                                                                                                                                                                                                                                  |                      |            |          |            |          |            |            |  |              |  |                                                                  |  |  |  |  |                                              |  |  |  |  |                                     |  |  |  |  |                                             |  |  |  |  |                                    |  |  |  |  |                                                  |  |  |  |  |                                        |  |  |  |  |                      |  |  |  |  |                                       |  |  |  |  |                                                         |  |  |  |  |                                                                     |  |  |  |  |                                                                                |  |  |  |  |                                                                 |  |  |  |  |                                         |  |  |  |  |                                    |  |  |  |  |
| plays less (e.g. with other animals and/or toys) than he/she did 18 months ago |                                                                                                                                                                                                                                                                                                                                                                                                                                                                                                                                                                                                                                                                                                                                                                                                                                                                                                                                                                                                                                                                                                                                                                                                                                                                                                                                                                                                                                                                                                                                                                                                                                                                                                                                                                                                                                                                                                                                                                                                                                                                                                                                                                                                                                                                                                                                                                                                                  |                      |            |          |            |          |            |            |  |              |  |                                                                  |  |  |  |  |                                              |  |  |  |  |                                     |  |  |  |  |                                             |  |  |  |  |                                    |  |  |  |  |                                                  |  |  |  |  |                                        |  |  |  |  |                      |  |  |  |  |                                       |  |  |  |  |                                                         |  |  |  |  |                                                                     |  |  |  |  |                                                                                |  |  |  |  |                                                                 |  |  |  |  |                                         |  |  |  |  |                                    |  |  |  |  |
| sleeps more and/or is less active than he/she did 18 months ago                |                                                                                                                                                                                                                                                                                                                                                                                                                                                                                                                                                                                                                                                                                                                                                                                                                                                                                                                                                                                                                                                                                                                                                                                                                                                                                                                                                                                                                                                                                                                                                                                                                                                                                                                                                                                                                                                                                                                                                                                                                                                                                                                                                                                                                                                                                                                                                                                                                  |                      |            |          |            |          |            |            |  |              |  |                                                                  |  |  |  |  |                                              |  |  |  |  |                                     |  |  |  |  |                                             |  |  |  |  |                                    |  |  |  |  |                                                  |  |  |  |  |                                        |  |  |  |  |                      |  |  |  |  |                                       |  |  |  |  |                                                         |  |  |  |  |                                                                     |  |  |  |  |                                                                                |  |  |  |  |                                                                 |  |  |  |  |                                         |  |  |  |  |                                    |  |  |  |  |
| cries out loudly for no apparent reason                                        |                                                                                                                                                                                                                                                                                                                                                                                                                                                                                                                                                                                                                                                                                                                                                                                                                                                                                                                                                                                                                                                                                                                                                                                                                                                                                                                                                                                                                                                                                                                                                                                                                                                                                                                                                                                                                                                                                                                                                                                                                                                                                                                                                                                                                                                                                                                                                                                                                  |                      |            |          |            |          |            |            |  |              |  |                                                                  |  |  |  |  |                                              |  |  |  |  |                                     |  |  |  |  |                                             |  |  |  |  |                                    |  |  |  |  |                                                  |  |  |  |  |                                        |  |  |  |  |                      |  |  |  |  |                                       |  |  |  |  |                                                         |  |  |  |  |                                                                     |  |  |  |  |                                                                                |  |  |  |  |                                                                 |  |  |  |  |                                         |  |  |  |  |                                    |  |  |  |  |
| appears forgetful or disorientated                                             |                                                                                                                                                                                                                                                                                                                                                                                                                                                                                                                                                                                                                                                                                                                                                                                                                                                                                                                                                                                                                                                                                                                                                                                                                                                                                                                                                                                                                                                                                                                                                                                                                                                                                                                                                                                                                                                                                                                                                                                                                                                                                                                                                                                                                                                                                                                                                                                                                  |                      |            |          |            |          |            |            |  |              |  |                                                                  |  |  |  |  |                                              |  |  |  |  |                                     |  |  |  |  |                                             |  |  |  |  |                                    |  |  |  |  |                                                  |  |  |  |  |                                        |  |  |  |  |                      |  |  |  |  |                                       |  |  |  |  |                                                         |  |  |  |  |                                                                     |  |  |  |  |                                                                                |  |  |  |  |                                                                 |  |  |  |  |                                         |  |  |  |  |                                    |  |  |  |  |
| E3                                                                             | Please rate how well you think your cat is able to carry out the following activities during a 'typical' week?                                                                                                                                                                                                                                                                                                                                                                                                                                                                                                                                                                                                                                                                                                                                                                                                                                                                                                                                                                                                                                                                                                                                                                                                                                                                                                                                                                                                                                                                                                                                                                                                                                                                                                                                                                                                                                                                                                                                                                                                                                                                                                                                                                                                                                                                                                   |                      |            |          |            |          |            |            |  |              |  |                                                                  |  |  |  |  |                                              |  |  |  |  |                                     |  |  |  |  |                                             |  |  |  |  |                                    |  |  |  |  |                                                  |  |  |  |  |                                        |  |  |  |  |                      |  |  |  |  |                                       |  |  |  |  |                                                         |  |  |  |  |                                                                     |  |  |  |  |                                                                                |  |  |  |  |                                                                 |  |  |  |  |                                         |  |  |  |  |                                    |  |  |  |  |
|                                                                                | <b><i>Tick one box per row</i></b>                                                                                                                                                                                                                                                                                                                                                                                                                                                                                                                                                                                                                                                                                                                                                                                                                                                                                                                                                                                                                                                                                                                                                                                                                                                                                                                                                                                                                                                                                                                                                                                                                                                                                                                                                                                                                                                                                                                                                                                                                                                                                                                                                                                                                                                                                                                                                                               |                      |            |          |            |          |            |            |  |              |  |                                                                  |  |  |  |  |                                              |  |  |  |  |                                     |  |  |  |  |                                             |  |  |  |  |                                    |  |  |  |  |                                                  |  |  |  |  |                                        |  |  |  |  |                      |  |  |  |  |                                       |  |  |  |  |                                                         |  |  |  |  |                                                                     |  |  |  |  |                                                                                |  |  |  |  |                                                                 |  |  |  |  |                                         |  |  |  |  |                                    |  |  |  |  |
|                                                                                | <table border="1" style="width: 100%; border-collapse: collapse;"> <thead> <tr> <th style="width: 30%;"></th> <th style="width: 15%;">Very well</th> <th style="width: 15%;">Well</th> <th style="width: 15%;">Adequately</th> <th style="width: 15%;">Not well</th> </tr> </thead> <tbody> <tr> <td style="padding: 5px;">Grooming</td> <td></td> <td></td> <td></td> <td></td> </tr> <tr> <td style="padding: 5px;">Eating</td> <td></td> <td></td> <td></td> <td></td> </tr> <tr> <td style="padding: 5px;">Moving around</td> <td></td> <td></td> <td></td> <td></td> </tr> </tbody> </table>                                                                                                                                                                                                                                                                                                                                                                                                                                                                                                                                                                                                                                                                                                                                                                                                                                                                                                                                                                                                                                                                                                                                                                                                                                                                                                                                                                                                                                                                                                                                                                                                                                                                                                                                                                                                                |                      | Very well  | Well     | Adequately | Not well | Grooming   |            |  |              |  | Eating                                                           |  |  |  |  | Moving around                                |  |  |  |  |                                     |  |  |  |  |                                             |  |  |  |  |                                    |  |  |  |  |                                                  |  |  |  |  |                                        |  |  |  |  |                      |  |  |  |  |                                       |  |  |  |  |                                                         |  |  |  |  |                                                                     |  |  |  |  |                                                                                |  |  |  |  |                                                                 |  |  |  |  |                                         |  |  |  |  |                                    |  |  |  |  |
|                                                                                | Very well                                                                                                                                                                                                                                                                                                                                                                                                                                                                                                                                                                                                                                                                                                                                                                                                                                                                                                                                                                                                                                                                                                                                                                                                                                                                                                                                                                                                                                                                                                                                                                                                                                                                                                                                                                                                                                                                                                                                                                                                                                                                                                                                                                                                                                                                                                                                                                                                        | Well                 | Adequately | Not well |            |          |            |            |  |              |  |                                                                  |  |  |  |  |                                              |  |  |  |  |                                     |  |  |  |  |                                             |  |  |  |  |                                    |  |  |  |  |                                                  |  |  |  |  |                                        |  |  |  |  |                      |  |  |  |  |                                       |  |  |  |  |                                                         |  |  |  |  |                                                                     |  |  |  |  |                                                                                |  |  |  |  |                                                                 |  |  |  |  |                                         |  |  |  |  |                                    |  |  |  |  |
| Grooming                                                                       |                                                                                                                                                                                                                                                                                                                                                                                                                                                                                                                                                                                                                                                                                                                                                                                                                                                                                                                                                                                                                                                                                                                                                                                                                                                                                                                                                                                                                                                                                                                                                                                                                                                                                                                                                                                                                                                                                                                                                                                                                                                                                                                                                                                                                                                                                                                                                                                                                  |                      |            |          |            |          |            |            |  |              |  |                                                                  |  |  |  |  |                                              |  |  |  |  |                                     |  |  |  |  |                                             |  |  |  |  |                                    |  |  |  |  |                                                  |  |  |  |  |                                        |  |  |  |  |                      |  |  |  |  |                                       |  |  |  |  |                                                         |  |  |  |  |                                                                     |  |  |  |  |                                                                                |  |  |  |  |                                                                 |  |  |  |  |                                         |  |  |  |  |                                    |  |  |  |  |
| Eating                                                                         |                                                                                                                                                                                                                                                                                                                                                                                                                                                                                                                                                                                                                                                                                                                                                                                                                                                                                                                                                                                                                                                                                                                                                                                                                                                                                                                                                                                                                                                                                                                                                                                                                                                                                                                                                                                                                                                                                                                                                                                                                                                                                                                                                                                                                                                                                                                                                                                                                  |                      |            |          |            |          |            |            |  |              |  |                                                                  |  |  |  |  |                                              |  |  |  |  |                                     |  |  |  |  |                                             |  |  |  |  |                                    |  |  |  |  |                                                  |  |  |  |  |                                        |  |  |  |  |                      |  |  |  |  |                                       |  |  |  |  |                                                         |  |  |  |  |                                                                     |  |  |  |  |                                                                                |  |  |  |  |                                                                 |  |  |  |  |                                         |  |  |  |  |                                    |  |  |  |  |
| Moving around                                                                  |                                                                                                                                                                                                                                                                                                                                                                                                                                                                                                                                                                                                                                                                                                                                                                                                                                                                                                                                                                                                                                                                                                                                                                                                                                                                                                                                                                                                                                                                                                                                                                                                                                                                                                                                                                                                                                                                                                                                                                                                                                                                                                                                                                                                                                                                                                                                                                                                                  |                      |            |          |            |          |            |            |  |              |  |                                                                  |  |  |  |  |                                              |  |  |  |  |                                     |  |  |  |  |                                             |  |  |  |  |                                    |  |  |  |  |                                                  |  |  |  |  |                                        |  |  |  |  |                      |  |  |  |  |                                       |  |  |  |  |                                                         |  |  |  |  |                                                                     |  |  |  |  |                                                                                |  |  |  |  |                                                                 |  |  |  |  |                                         |  |  |  |  |                                    |  |  |  |  |

|                                                                                                                                                                                                                                                                                                                                                                       |                                                                                                                                                                            |             |              |                 |                          |        |            |
|-----------------------------------------------------------------------------------------------------------------------------------------------------------------------------------------------------------------------------------------------------------------------------------------------------------------------------------------------------------------------|----------------------------------------------------------------------------------------------------------------------------------------------------------------------------|-------------|--------------|-----------------|--------------------------|--------|------------|
| E4                                                                                                                                                                                                                                                                                                                                                                    | Please indicate how easily your cat can jump up onto the following places:                                                                                                 |             |              |                 |                          |        |            |
|                                                                                                                                                                                                                                                                                                                                                                       | <b>Tick one box per row</b>                                                                                                                                                |             |              |                 |                          |        |            |
|                                                                                                                                                                                                                                                                                                                                                                       |                                                                                                                                                                            | Very easily | Quite easily | Not very easily | With a lot of difficulty | Cannot | Don't know |
|                                                                                                                                                                                                                                                                                                                                                                       | Sofa                                                                                                                                                                       |             |              |                 |                          |        |            |
|                                                                                                                                                                                                                                                                                                                                                                       | Your bed                                                                                                                                                                   |             |              |                 |                          |        |            |
| Kitchen work surface                                                                                                                                                                                                                                                                                                                                                  |                                                                                                                                                                            |             |              |                 |                          |        |            |
| Kitchen / dining table                                                                                                                                                                                                                                                                                                                                                |                                                                                                                                                                            |             |              |                 |                          |        |            |
| <p>We are assuming the following <i>approximate</i> standard heights.<br/> Sofa: 40 cm (16")                      Work surface: 90 cm (36")<br/> Bed: 55 cm (22")                      Table: 78 cm (31")</p> <p>If your furniture is a 'non-standard' height, please provide a measurement at the end of the questionnaire in the space for further information.</p> |                                                                                                                                                                            |             |              |                 |                          |        |            |
| E5                                                                                                                                                                                                                                                                                                                                                                    | Please rate your perception of your cat's activity levels during the past week using the options below.                                                                    |             |              |                 |                          |        |            |
|                                                                                                                                                                                                                                                                                                                                                                       | <b>Tick one box</b>                                                                                                                                                        |             |              |                 |                          |        |            |
|                                                                                                                                                                                                                                                                                                                                                                       | Very active                                                                                                                                                                |             |              |                 |                          |        |            |
|                                                                                                                                                                                                                                                                                                                                                                       | Quite active                                                                                                                                                               |             |              |                 |                          |        |            |
|                                                                                                                                                                                                                                                                                                                                                                       | Not very active                                                                                                                                                            |             |              |                 |                          |        |            |
| Not at all active                                                                                                                                                                                                                                                                                                                                                     |                                                                                                                                                                            |             |              |                 |                          |        |            |
| E6                                                                                                                                                                                                                                                                                                                                                                    | Do you believe that there are currently any 'external' factors that are affecting your cat's mental or physical wellbeing? (E.g. bullying from another cat, moving house). |             |              |                 |                          |        |            |
|                                                                                                                                                                                                                                                                                                                                                                       | <b>Tick one box</b>                                                                                                                                                        |             |              |                 |                          |        |            |
|                                                                                                                                                                                                                                                                                                                                                                       | Yes                                                                                                                                                                        |             |              |                 |                          |        |            |
|                                                                                                                                                                                                                                                                                                                                                                       | No                                                                                                                                                                         |             |              |                 |                          |        |            |
| <b>If 'No', go to E8.</b>                                                                                                                                                                                                                                                                                                                                             |                                                                                                                                                                            |             |              |                 |                          |        |            |
| E7                                                                                                                                                                                                                                                                                                                                                                    | We would be grateful if you could provide further details about these 'external' factors.                                                                                  |             |              |                 |                          |        |            |
| E8                                                                                                                                                                                                                                                                                                                                                                    | Please rate your perception of your cat's overall quality of life <b>during the past week</b> using the options below.                                                     |             |              |                 |                          |        |            |
|                                                                                                                                                                                                                                                                                                                                                                       | <b>Tick one box</b>                                                                                                                                                        |             |              |                 |                          |        |            |
|                                                                                                                                                                                                                                                                                                                                                                       | Excellent                                                                                                                                                                  |             |              |                 |                          |        |            |
|                                                                                                                                                                                                                                                                                                                                                                       | Good                                                                                                                                                                       |             |              |                 |                          |        |            |
|                                                                                                                                                                                                                                                                                                                                                                       | Average                                                                                                                                                                    |             |              |                 |                          |        |            |
|                                                                                                                                                                                                                                                                                                                                                                       | Fair                                                                                                                                                                       |             |              |                 |                          |        |            |
| Poor                                                                                                                                                                                                                                                                                                                                                                  |                                                                                                                                                                            |             |              |                 |                          |        |            |
| E9                                                                                                                                                                                                                                                                                                                                                                    | What factors contributed towards your selection of this rating?                                                                                                            |             |              |                 |                          |        |            |

## SECTION F: About your cat's behaviour and characteristics

| F1                                                                | <p><b><i>If you only have one cat, please go to F2.</i></b></p> <p>If you have more than one cat, which of these statements best describes how your 'Bristol Study cat' interacts with other cats in the household? He/she...</p> <table border="1" style="width: 100%; border-collapse: collapse; margin-top: 10px;"> <thead> <tr> <th rowspan="2" style="width: 80%;"></th> <th colspan="2" style="text-align: center; font-weight: bold; font-size: small;">Tick one box per row</th> </tr> <tr> <th style="width: 10%; text-align: center; font-size: x-small;">Yes</th> <th style="width: 10%; text-align: center; font-size: x-small;">No</th> </tr> </thead> <tbody> <tr><td style="font-size: x-small;">Sleeps in the same room as another cat, but not close together</td><td></td><td></td></tr> <tr><td style="font-size: x-small;">Shares a sleeping place with another cat</td><td></td><td></td></tr> <tr><td style="font-size: x-small;">Sleeps with another cat where they are touching each other</td><td></td><td></td></tr> <tr><td style="font-size: x-small;">Grooms another cat</td><td></td><td></td></tr> <tr><td style="font-size: x-small;">Is groomed by another cat</td><td></td><td></td></tr> <tr><td style="font-size: x-small;">Rubs on another cat</td><td></td><td></td></tr> <tr><td style="font-size: x-small;">Is rubbed on by another cat</td><td></td><td></td></tr> <tr><td style="font-size: x-small;">Chases another cat</td><td></td><td></td></tr> <tr><td style="font-size: x-small;">Is chased by another cat</td><td></td><td></td></tr> <tr><td style="font-size: x-small;">Plays with another cat</td><td></td><td></td></tr> <tr><td style="font-size: x-small;">Hisses or spits at another cat</td><td></td><td></td></tr> <tr><td style="font-size: x-small;">Is hissed or spat at by another cat</td><td></td><td></td></tr> <tr><td style="font-size: x-small;">Is reluctant to pass another cat in a narrow space (e.g. doorway)</td><td></td><td></td></tr> <tr><td style="font-size: x-small;">Blocks or inhibits the movement of another cat</td><td></td><td></td></tr> </tbody> </table> |    | Tick one box per row |     | Yes | No | Sleeps in the same room as another cat, but not close together |  |  | Shares a sleeping place with another cat |  |  | Sleeps with another cat where they are touching each other |  |  | Grooms another cat |  |  | Is groomed by another cat |  |  | Rubs on another cat |  |  | Is rubbed on by another cat |  |  | Chases another cat |  |  | Is chased by another cat |  |  | Plays with another cat |  |  | Hisses or spits at another cat |  |  | Is hissed or spat at by another cat |  |  | Is reluctant to pass another cat in a narrow space (e.g. doorway) |  |  | Blocks or inhibits the movement of another cat |  |  |
|-------------------------------------------------------------------|------------------------------------------------------------------------------------------------------------------------------------------------------------------------------------------------------------------------------------------------------------------------------------------------------------------------------------------------------------------------------------------------------------------------------------------------------------------------------------------------------------------------------------------------------------------------------------------------------------------------------------------------------------------------------------------------------------------------------------------------------------------------------------------------------------------------------------------------------------------------------------------------------------------------------------------------------------------------------------------------------------------------------------------------------------------------------------------------------------------------------------------------------------------------------------------------------------------------------------------------------------------------------------------------------------------------------------------------------------------------------------------------------------------------------------------------------------------------------------------------------------------------------------------------------------------------------------------------------------------------------------------------------------------------------------------------------------------------------------------------------------------------------------------------------------------------------------------------------------------------------------------------------------------------------------------------------------------------------------------------------------------------------------------------------------------------------------------------------------------------------------------------------|----|----------------------|-----|-----|----|----------------------------------------------------------------|--|--|------------------------------------------|--|--|------------------------------------------------------------|--|--|--------------------|--|--|---------------------------|--|--|---------------------|--|--|-----------------------------|--|--|--------------------|--|--|--------------------------|--|--|------------------------|--|--|--------------------------------|--|--|-------------------------------------|--|--|-------------------------------------------------------------------|--|--|------------------------------------------------|--|--|
|                                                                   | Tick one box per row                                                                                                                                                                                                                                                                                                                                                                                                                                                                                                                                                                                                                                                                                                                                                                                                                                                                                                                                                                                                                                                                                                                                                                                                                                                                                                                                                                                                                                                                                                                                                                                                                                                                                                                                                                                                                                                                                                                                                                                                                                                                                                                                 |    |                      |     |     |    |                                                                |  |  |                                          |  |  |                                                            |  |  |                    |  |  |                           |  |  |                     |  |  |                             |  |  |                    |  |  |                          |  |  |                        |  |  |                                |  |  |                                     |  |  |                                                                   |  |  |                                                |  |  |
|                                                                   | Yes                                                                                                                                                                                                                                                                                                                                                                                                                                                                                                                                                                                                                                                                                                                                                                                                                                                                                                                                                                                                                                                                                                                                                                                                                                                                                                                                                                                                                                                                                                                                                                                                                                                                                                                                                                                                                                                                                                                                                                                                                                                                                                                                                  | No |                      |     |     |    |                                                                |  |  |                                          |  |  |                                                            |  |  |                    |  |  |                           |  |  |                     |  |  |                             |  |  |                    |  |  |                          |  |  |                        |  |  |                                |  |  |                                     |  |  |                                                                   |  |  |                                                |  |  |
| Sleeps in the same room as another cat, but not close together    |                                                                                                                                                                                                                                                                                                                                                                                                                                                                                                                                                                                                                                                                                                                                                                                                                                                                                                                                                                                                                                                                                                                                                                                                                                                                                                                                                                                                                                                                                                                                                                                                                                                                                                                                                                                                                                                                                                                                                                                                                                                                                                                                                      |    |                      |     |     |    |                                                                |  |  |                                          |  |  |                                                            |  |  |                    |  |  |                           |  |  |                     |  |  |                             |  |  |                    |  |  |                          |  |  |                        |  |  |                                |  |  |                                     |  |  |                                                                   |  |  |                                                |  |  |
| Shares a sleeping place with another cat                          |                                                                                                                                                                                                                                                                                                                                                                                                                                                                                                                                                                                                                                                                                                                                                                                                                                                                                                                                                                                                                                                                                                                                                                                                                                                                                                                                                                                                                                                                                                                                                                                                                                                                                                                                                                                                                                                                                                                                                                                                                                                                                                                                                      |    |                      |     |     |    |                                                                |  |  |                                          |  |  |                                                            |  |  |                    |  |  |                           |  |  |                     |  |  |                             |  |  |                    |  |  |                          |  |  |                        |  |  |                                |  |  |                                     |  |  |                                                                   |  |  |                                                |  |  |
| Sleeps with another cat where they are touching each other        |                                                                                                                                                                                                                                                                                                                                                                                                                                                                                                                                                                                                                                                                                                                                                                                                                                                                                                                                                                                                                                                                                                                                                                                                                                                                                                                                                                                                                                                                                                                                                                                                                                                                                                                                                                                                                                                                                                                                                                                                                                                                                                                                                      |    |                      |     |     |    |                                                                |  |  |                                          |  |  |                                                            |  |  |                    |  |  |                           |  |  |                     |  |  |                             |  |  |                    |  |  |                          |  |  |                        |  |  |                                |  |  |                                     |  |  |                                                                   |  |  |                                                |  |  |
| Grooms another cat                                                |                                                                                                                                                                                                                                                                                                                                                                                                                                                                                                                                                                                                                                                                                                                                                                                                                                                                                                                                                                                                                                                                                                                                                                                                                                                                                                                                                                                                                                                                                                                                                                                                                                                                                                                                                                                                                                                                                                                                                                                                                                                                                                                                                      |    |                      |     |     |    |                                                                |  |  |                                          |  |  |                                                            |  |  |                    |  |  |                           |  |  |                     |  |  |                             |  |  |                    |  |  |                          |  |  |                        |  |  |                                |  |  |                                     |  |  |                                                                   |  |  |                                                |  |  |
| Is groomed by another cat                                         |                                                                                                                                                                                                                                                                                                                                                                                                                                                                                                                                                                                                                                                                                                                                                                                                                                                                                                                                                                                                                                                                                                                                                                                                                                                                                                                                                                                                                                                                                                                                                                                                                                                                                                                                                                                                                                                                                                                                                                                                                                                                                                                                                      |    |                      |     |     |    |                                                                |  |  |                                          |  |  |                                                            |  |  |                    |  |  |                           |  |  |                     |  |  |                             |  |  |                    |  |  |                          |  |  |                        |  |  |                                |  |  |                                     |  |  |                                                                   |  |  |                                                |  |  |
| Rubs on another cat                                               |                                                                                                                                                                                                                                                                                                                                                                                                                                                                                                                                                                                                                                                                                                                                                                                                                                                                                                                                                                                                                                                                                                                                                                                                                                                                                                                                                                                                                                                                                                                                                                                                                                                                                                                                                                                                                                                                                                                                                                                                                                                                                                                                                      |    |                      |     |     |    |                                                                |  |  |                                          |  |  |                                                            |  |  |                    |  |  |                           |  |  |                     |  |  |                             |  |  |                    |  |  |                          |  |  |                        |  |  |                                |  |  |                                     |  |  |                                                                   |  |  |                                                |  |  |
| Is rubbed on by another cat                                       |                                                                                                                                                                                                                                                                                                                                                                                                                                                                                                                                                                                                                                                                                                                                                                                                                                                                                                                                                                                                                                                                                                                                                                                                                                                                                                                                                                                                                                                                                                                                                                                                                                                                                                                                                                                                                                                                                                                                                                                                                                                                                                                                                      |    |                      |     |     |    |                                                                |  |  |                                          |  |  |                                                            |  |  |                    |  |  |                           |  |  |                     |  |  |                             |  |  |                    |  |  |                          |  |  |                        |  |  |                                |  |  |                                     |  |  |                                                                   |  |  |                                                |  |  |
| Chases another cat                                                |                                                                                                                                                                                                                                                                                                                                                                                                                                                                                                                                                                                                                                                                                                                                                                                                                                                                                                                                                                                                                                                                                                                                                                                                                                                                                                                                                                                                                                                                                                                                                                                                                                                                                                                                                                                                                                                                                                                                                                                                                                                                                                                                                      |    |                      |     |     |    |                                                                |  |  |                                          |  |  |                                                            |  |  |                    |  |  |                           |  |  |                     |  |  |                             |  |  |                    |  |  |                          |  |  |                        |  |  |                                |  |  |                                     |  |  |                                                                   |  |  |                                                |  |  |
| Is chased by another cat                                          |                                                                                                                                                                                                                                                                                                                                                                                                                                                                                                                                                                                                                                                                                                                                                                                                                                                                                                                                                                                                                                                                                                                                                                                                                                                                                                                                                                                                                                                                                                                                                                                                                                                                                                                                                                                                                                                                                                                                                                                                                                                                                                                                                      |    |                      |     |     |    |                                                                |  |  |                                          |  |  |                                                            |  |  |                    |  |  |                           |  |  |                     |  |  |                             |  |  |                    |  |  |                          |  |  |                        |  |  |                                |  |  |                                     |  |  |                                                                   |  |  |                                                |  |  |
| Plays with another cat                                            |                                                                                                                                                                                                                                                                                                                                                                                                                                                                                                                                                                                                                                                                                                                                                                                                                                                                                                                                                                                                                                                                                                                                                                                                                                                                                                                                                                                                                                                                                                                                                                                                                                                                                                                                                                                                                                                                                                                                                                                                                                                                                                                                                      |    |                      |     |     |    |                                                                |  |  |                                          |  |  |                                                            |  |  |                    |  |  |                           |  |  |                     |  |  |                             |  |  |                    |  |  |                          |  |  |                        |  |  |                                |  |  |                                     |  |  |                                                                   |  |  |                                                |  |  |
| Hisses or spits at another cat                                    |                                                                                                                                                                                                                                                                                                                                                                                                                                                                                                                                                                                                                                                                                                                                                                                                                                                                                                                                                                                                                                                                                                                                                                                                                                                                                                                                                                                                                                                                                                                                                                                                                                                                                                                                                                                                                                                                                                                                                                                                                                                                                                                                                      |    |                      |     |     |    |                                                                |  |  |                                          |  |  |                                                            |  |  |                    |  |  |                           |  |  |                     |  |  |                             |  |  |                    |  |  |                          |  |  |                        |  |  |                                |  |  |                                     |  |  |                                                                   |  |  |                                                |  |  |
| Is hissed or spat at by another cat                               |                                                                                                                                                                                                                                                                                                                                                                                                                                                                                                                                                                                                                                                                                                                                                                                                                                                                                                                                                                                                                                                                                                                                                                                                                                                                                                                                                                                                                                                                                                                                                                                                                                                                                                                                                                                                                                                                                                                                                                                                                                                                                                                                                      |    |                      |     |     |    |                                                                |  |  |                                          |  |  |                                                            |  |  |                    |  |  |                           |  |  |                     |  |  |                             |  |  |                    |  |  |                          |  |  |                        |  |  |                                |  |  |                                     |  |  |                                                                   |  |  |                                                |  |  |
| Is reluctant to pass another cat in a narrow space (e.g. doorway) |                                                                                                                                                                                                                                                                                                                                                                                                                                                                                                                                                                                                                                                                                                                                                                                                                                                                                                                                                                                                                                                                                                                                                                                                                                                                                                                                                                                                                                                                                                                                                                                                                                                                                                                                                                                                                                                                                                                                                                                                                                                                                                                                                      |    |                      |     |     |    |                                                                |  |  |                                          |  |  |                                                            |  |  |                    |  |  |                           |  |  |                     |  |  |                             |  |  |                    |  |  |                          |  |  |                        |  |  |                                |  |  |                                     |  |  |                                                                   |  |  |                                                |  |  |
| Blocks or inhibits the movement of another cat                    |                                                                                                                                                                                                                                                                                                                                                                                                                                                                                                                                                                                                                                                                                                                                                                                                                                                                                                                                                                                                                                                                                                                                                                                                                                                                                                                                                                                                                                                                                                                                                                                                                                                                                                                                                                                                                                                                                                                                                                                                                                                                                                                                                      |    |                      |     |     |    |                                                                |  |  |                                          |  |  |                                                            |  |  |                    |  |  |                           |  |  |                     |  |  |                             |  |  |                    |  |  |                          |  |  |                        |  |  |                                |  |  |                                     |  |  |                                                                   |  |  |                                                |  |  |
| F2                                                                | <p><i>Does your cat display any undesirable behaviours?</i></p> <table border="1" style="margin-left: auto; margin-right: auto; border-collapse: collapse;"> <tr> <td style="width: 30%;"></td> <td style="text-align: center; font-weight: bold; font-size: small;">Tick one box</td> </tr> <tr> <td style="font-size: x-small;">Yes</td> <td></td> </tr> <tr> <td style="font-size: x-small;">No</td> <td></td> </tr> </table> <p><b><i>If 'No', please go to section G.</i></b></p>                                                                                                                                                                                                                                                                                                                                                                                                                                                                                                                                                                                                                                                                                                                                                                                                                                                                                                                                                                                                                                                                                                                                                                                                                                                                                                                                                                                                                                                                                                                                                                                                                                                               |    | Tick one box         | Yes |     | No |                                                                |  |  |                                          |  |  |                                                            |  |  |                    |  |  |                           |  |  |                     |  |  |                             |  |  |                    |  |  |                          |  |  |                        |  |  |                                |  |  |                                     |  |  |                                                                   |  |  |                                                |  |  |
|                                                                   | Tick one box                                                                                                                                                                                                                                                                                                                                                                                                                                                                                                                                                                                                                                                                                                                                                                                                                                                                                                                                                                                                                                                                                                                                                                                                                                                                                                                                                                                                                                                                                                                                                                                                                                                                                                                                                                                                                                                                                                                                                                                                                                                                                                                                         |    |                      |     |     |    |                                                                |  |  |                                          |  |  |                                                            |  |  |                    |  |  |                           |  |  |                     |  |  |                             |  |  |                    |  |  |                          |  |  |                        |  |  |                                |  |  |                                     |  |  |                                                                   |  |  |                                                |  |  |
| Yes                                                               |                                                                                                                                                                                                                                                                                                                                                                                                                                                                                                                                                                                                                                                                                                                                                                                                                                                                                                                                                                                                                                                                                                                                                                                                                                                                                                                                                                                                                                                                                                                                                                                                                                                                                                                                                                                                                                                                                                                                                                                                                                                                                                                                                      |    |                      |     |     |    |                                                                |  |  |                                          |  |  |                                                            |  |  |                    |  |  |                           |  |  |                     |  |  |                             |  |  |                    |  |  |                          |  |  |                        |  |  |                                |  |  |                                     |  |  |                                                                   |  |  |                                                |  |  |
| No                                                                |                                                                                                                                                                                                                                                                                                                                                                                                                                                                                                                                                                                                                                                                                                                                                                                                                                                                                                                                                                                                                                                                                                                                                                                                                                                                                                                                                                                                                                                                                                                                                                                                                                                                                                                                                                                                                                                                                                                                                                                                                                                                                                                                                      |    |                      |     |     |    |                                                                |  |  |                                          |  |  |                                                            |  |  |                    |  |  |                           |  |  |                     |  |  |                             |  |  |                    |  |  |                          |  |  |                        |  |  |                                |  |  |                                     |  |  |                                                                   |  |  |                                                |  |  |
| F3                                                                | <p>If yes, please describe this/these behaviour(s).</p> <p>Behaviour 1:</p> <p>Behaviour 2:</p> <p>Behaviour 3:</p> <p>Other undesirable behaviours:</p>                                                                                                                                                                                                                                                                                                                                                                                                                                                                                                                                                                                                                                                                                                                                                                                                                                                                                                                                                                                                                                                                                                                                                                                                                                                                                                                                                                                                                                                                                                                                                                                                                                                                                                                                                                                                                                                                                                                                                                                             |    |                      |     |     |    |                                                                |  |  |                                          |  |  |                                                            |  |  |                    |  |  |                           |  |  |                     |  |  |                             |  |  |                    |  |  |                          |  |  |                        |  |  |                                |  |  |                                     |  |  |                                                                   |  |  |                                                |  |  |

|                                                           |                                                                                                                                     |                                     |             |                                                                                  |    |
|-----------------------------------------------------------|-------------------------------------------------------------------------------------------------------------------------------------|-------------------------------------|-------------|----------------------------------------------------------------------------------|----|
| F4                                                        | For each of the behaviours listed above, (or for the first three listed), please provide the following information:                 |                                     |             |                                                                                  |    |
|                                                           | <b>Tick all that apply</b>                                                                                                          |                                     |             |                                                                                  |    |
|                                                           | Behaviour                                                                                                                           | Is this behaviour a problem to you? |             | Please indicate whether or not you have sought help for these behaviour problems |    |
|                                                           |                                                                                                                                     | Yes                                 | No          | Yes                                                                              | No |
|                                                           | Behaviour 1                                                                                                                         |                                     |             |                                                                                  |    |
|                                                           | Behaviour 2                                                                                                                         |                                     |             |                                                                                  |    |
| Behaviour 3                                               |                                                                                                                                     |                                     |             |                                                                                  |    |
| <b>If 'No' to all behaviours, please go to section G.</b> |                                                                                                                                     |                                     |             |                                                                                  |    |
| F5                                                        | Please tick which of these sources you have sought help from for each of these behaviour problems, (or for the first three listed). |                                     |             |                                                                                  |    |
|                                                           | <b>Tick all that apply</b>                                                                                                          |                                     |             |                                                                                  |    |
|                                                           |                                                                                                                                     | Behaviour 1                         | Behaviour 2 | Behaviour 3                                                                      |    |
|                                                           | Vet                                                                                                                                 |                                     |             |                                                                                  |    |
|                                                           | Vet behaviourist                                                                                                                    |                                     |             |                                                                                  |    |
|                                                           | Behaviourist                                                                                                                        |                                     |             |                                                                                  |    |
|                                                           | Vet Nurse                                                                                                                           |                                     |             |                                                                                  |    |
|                                                           | Other members of vet practice staff                                                                                                 |                                     |             |                                                                                  |    |
|                                                           | Friend                                                                                                                              |                                     |             |                                                                                  |    |
|                                                           | Books                                                                                                                               |                                     |             |                                                                                  |    |
|                                                           | Animal welfare organisation staff/online resources                                                                                  |                                     |             |                                                                                  |    |
|                                                           | Online sources not mentioned above (including forums)                                                                               |                                     |             |                                                                                  |    |
|                                                           | Other ( <i>please provide details</i> )                                                                                             |                                     |             |                                                                                  |    |
| Have not sought help                                      |                                                                                                                                     |                                     |             |                                                                                  |    |

## **SECTION G: Your cat's neighbourhood**

G1 If your cat has been registered with a veterinary practice (for the first time, or with a different veterinary practice), since you completed the last questionnaire for the 'Bristol Cats' study, and you are happy for us to access your cat's veterinary records, please provide the **name and address** of your cat's new veterinary practice below:  
 Name of veterinary practice:  
 Address:

G2 Have you moved house within the last 12 months?

|     |                     |
|-----|---------------------|
|     | <b>Tick one box</b> |
| Yes |                     |
| No  |                     |

***If 'No', please go to G5.***

G3 Which of these phrases best describes the location of your home?

|                                   |                     |
|-----------------------------------|---------------------|
|                                   | <b>Tick one box</b> |
| In a rural area                   |                     |
| In a village or suburban location |                     |
| In a town or city location        |                     |
| Don't know                        |                     |

G4 Do you have a garden? (Include communal gardens.)

|     |                     |
|-----|---------------------|
|     | <b>Tick one box</b> |
| Yes |                     |
| No  |                     |

***The next few questions check for the contact your cat has with local dogs and cats, possibly due to new dogs/cats moving to your area, or because you have moved house.***

G5 How many dogs (from other households) do you know of that are in your immediate neighbourhood? (I.e. dogs that your cat might see and/or hear outside regularly.)

|            |                     |
|------------|---------------------|
|            | <b>Tick one box</b> |
| None       |                     |
| 1-5        |                     |
| 6-10       |                     |
| 11 or more |                     |

G6 How many cats (from other households) do you know of that are in your immediate neighbourhood? (I.e. cats from other household that your cat might see and/or hear outside regularly.)

|            |                     |
|------------|---------------------|
|            | <b>Tick one box</b> |
| None       |                     |
| 1-5        |                     |
| 6-10       |                     |
| 11 or more |                     |

***If 'None', go to G12.***

|                                                                      |                                                                                                                                       |             |            |                  |                   |
|----------------------------------------------------------------------|---------------------------------------------------------------------------------------------------------------------------------------|-------------|------------|------------------|-------------------|
| G7                                                                   | Do any of these cats stare into your house through catflaps, doors or windows?                                                        |             |            |                  |                   |
|                                                                      | <b>Tick one box</b>                                                                                                                   |             |            |                  |                   |
|                                                                      | Yes                                                                                                                                   |             |            |                  |                   |
|                                                                      | No                                                                                                                                    |             |            |                  |                   |
| G8                                                                   | In which of these ways does your cat react if he/she sees any of these cats in his/her house or garden?                               |             |            |                  |                   |
|                                                                      | <b>Tick all that apply</b>                                                                                                            |             |            |                  |                   |
|                                                                      | Ignores them                                                                                                                          |             |            |                  |                   |
|                                                                      | Stays still                                                                                                                           |             |            |                  |                   |
|                                                                      | Hisses or spits                                                                                                                       |             |            |                  |                   |
|                                                                      | Chases them                                                                                                                           |             |            |                  |                   |
|                                                                      | Swipes his / her paw                                                                                                                  |             |            |                  |                   |
|                                                                      | Runs away                                                                                                                             |             |            |                  |                   |
|                                                                      | Rubs against them                                                                                                                     |             |            |                  |                   |
|                                                                      | Licks or grooms them                                                                                                                  |             |            |                  |                   |
|                                                                      | Plays with them                                                                                                                       |             |            |                  |                   |
|                                                                      | Skirts around them                                                                                                                    |             |            |                  |                   |
| <b><i>If your cat is an 'indoor only' cat, please go to G12.</i></b> |                                                                                                                                       |             |            |                  |                   |
| G9                                                                   | How many cats (from other households) does your cat come into contact with at least once a week, in each of the following categories? |             |            |                  |                   |
|                                                                      | <b>Tick one box per row</b>                                                                                                           |             |            |                  |                   |
|                                                                      |                                                                                                                                       | <i>None</i> | <i>1-3</i> | <i>4 or more</i> | <i>Don't know</i> |
|                                                                      | 'Friends' of my cat (e.g. they play, spend time together)                                                                             |             |            |                  |                   |
|                                                                      | 'Acquaintances' of my cat (e.g. they meet occasionally but there is little contact between them)                                      |             |            |                  |                   |
|                                                                      | 'Enemies' of my cat (e.g. they fight, one of them will chase the other, they avoid each other)                                        |             |            |                  |                   |
| Other ( <i>please specify</i> ):                                     |                                                                                                                                       |             |            |                  |                   |
| G10                                                                  | Do any of these cats come into your house?                                                                                            |             |            |                  |                   |
|                                                                      | <b>Tick one box</b>                                                                                                                   |             |            |                  |                   |
|                                                                      | Yes                                                                                                                                   |             |            |                  |                   |
|                                                                      | No                                                                                                                                    |             |            |                  |                   |
| G11                                                                  | Do any of these cats come into your garden?                                                                                           |             |            |                  |                   |
|                                                                      | <b>Tick one box</b>                                                                                                                   |             |            |                  |                   |
|                                                                      | Yes                                                                                                                                   |             |            |                  |                   |
|                                                                      | No                                                                                                                                    |             |            |                  |                   |
|                                                                      | Don't know                                                                                                                            |             |            |                  |                   |

|     |                                                                                                                                                                                                                                            |                                       |                                    |
|-----|--------------------------------------------------------------------------------------------------------------------------------------------------------------------------------------------------------------------------------------------|---------------------------------------|------------------------------------|
| G12 | During the last six months, how often, if at all, do you think your cat has been involved in a fight with another cat?                                                                                                                     | <b><i>Tick one box per column</i></b> |                                    |
|     |                                                                                                                                                                                                                                            | <i>Cats within the household</i>      | <i>Cats from another household</i> |
|     | Not applicable (e.g. no other cats in household, cat does not have outside access)                                                                                                                                                         |                                       |                                    |
|     | Never                                                                                                                                                                                                                                      |                                       |                                    |
|     | Once a month or less often                                                                                                                                                                                                                 |                                       |                                    |
|     | 2-4 times a month                                                                                                                                                                                                                          |                                       |                                    |
|     | Once a week or more often                                                                                                                                                                                                                  |                                       |                                    |
| G13 | Please use this space to tell us about any <b>major changes</b> relating to your cat's <b>environment / behaviour / diet / health</b> that have taken place over the last 12 months and which have not been covered in this questionnaire. |                                       |                                    |
| G14 | All things considered, how willing would you be to take on the life your cat is now living?                                                                                                                                                |                                       |                                    |
|     |                                                                                                                                                                                                                                            | <b><i>Tick one box</i></b>            |                                    |
|     | Very willing                                                                                                                                                                                                                               |                                       |                                    |
|     | Quite willing                                                                                                                                                                                                                              |                                       |                                    |
|     | Not very willing                                                                                                                                                                                                                           |                                       |                                    |
|     | Not at all willing                                                                                                                                                                                                                         |                                       |                                    |
|     | I don't know                                                                                                                                                                                                                               |                                       |                                    |
| G15 | Please use this space for any additional comments you would like to add:                                                                                                                                                                   |                                       |                                    |

## **SECTION H: Final details**

Finally, please complete the details below for our records. This final section is very important and enables us to link this questionnaire with others you have completed for your cat. Please be reassured that this information is strictly confidential and will be used for no other purposes. Your contact details will ONLY be used for the purposes of the 'Bristol Cats' study.

|                                         |  |
|-----------------------------------------|--|
| <b>Date of questionnaire completion</b> |  |
| <b>IDENTIFYING INFORMATION:</b>         |  |
| <b>Bristol Cat 'Owner ID'</b>           |  |
| <b>Bristol Cat 'Cat ID'</b>             |  |
| <b>Name of cat</b>                      |  |
| <b>Your name</b>                        |  |
| <b>Address</b>                          |  |
| <b>Email address</b>                    |  |
| <b>Contact telephone number</b>         |  |

***Thank you very much for your time and help in completing this questionnaire.***

***We really appreciate the time that you have taken to complete this questionnaire to tell us about your cat. The information you give us about your cat will help us to help cats in the future. If you have any questions, please contact a member of the study team.***

Signature: .....Date: .....

Please return your completed questionnaire in the envelope enclosed.

Freepost RSHR-AGRJ-UABZ

Bristol Cats: Dr Jane Murray

University of Bristol, Langford House, Langford, BRISTOL, BS40 5DU
